# Supplementary material for: A Novel Strategy to Identify Endolysin With Lytic Activity Against Methicillin-Resistant Staphylococcus aureus
Source: Preprints.org preprint supplement (doi:10.20944/preprints202302.0072.v1), 2023-02-03
Supplement: Supplementary file 1 [file 230129_LyJH1892_Supplemental_table_All.xlsx]

## Sheet: Table S1
Table S1. List of collected genome of Staphylococcus aureus from National Center for
Biotechnology Information (collecting date: 06.02.2020) and Penicillin-binding protein 2a.
Organism name	Genome assembly	Bioproject	Assembly level	Penicillin-binding protein 2a
Staphylococcus aureus	GCA_002850395.1	PRJNA376656	Complete Genome	X
Staphylococcus aureus	GCA_001717685.3	PRJNA321116	Complete Genome	O
Staphylococcus aureus	GCA_000239235.1	PRJNA78269	Complete Genome	O
Staphylococcus aureus	GCA_002000825.1	PRJNA312385	Complete Genome	O
Staphylococcus aureus	GCA_000626615.3	PRJNA231221	Complete Genome	O
Staphylococcus aureus	GCA_008936375.1	PRJNA470993	Complete Genome	O
Staphylococcus aureus	GCA_001019415.2	PRJNA231221	Complete Genome	X
Staphylococcus aureus	GCA_008934675.1	PRJNA470993	Complete Genome	O
Staphylococcus aureus	GCA_008934555.1	PRJNA470993	Complete Genome	O
Staphylococcus aureus	GCA_000967385.1	PRJEA71353	Complete Genome	O
Staphylococcus aureus	GCA_008936035.1	PRJNA470993	Complete Genome	O
Staphylococcus aureus	GCA_002633765.1	PRJNA243331	Complete Genome	X
Staphylococcus aureus	GCA_008934455.1	PRJNA470993	Complete Genome	O
Staphylococcus aureus	GCA_001611425.1	PRJNA298748	Complete Genome	X
Staphylococcus aureus	GCA_003354545.1	PRJNA393749	Complete Genome	X
Staphylococcus aureus	GCA_900474665.1	PRJEB6403	Complete Genome	X
Staphylococcus aureus	GCA_009857055.1	PRJNA598122	Complete Genome	O
Staphylococcus aureus	GCA_008935855.1	PRJNA470993	Complete Genome	O
Staphylococcus aureus	GCA_003609895.1	PRJDB4365	Complete Genome	X
Staphylococcus aureus	GCA_009912475.1	PRJNA528186	Complete Genome	X
Staphylococcus aureus	GCA_000009005.1	PRJNA63	Complete Genome	X
Staphylococcus aureus	GCA_001444345.1	PRJNA301649	Complete Genome	X
Staphylococcus aureus	GCA_002000845.1	PRJNA312385	Complete Genome	O
Staphylococcus aureus	GCA_900635245.1	PRJEB6403	Complete Genome	O
Staphylococcus aureus	GCA_008936335.1	PRJNA470993	Complete Genome	O
Staphylococcus aureus	GCA_003342775.1	PRJNA481439	Complete Genome	O
Staphylococcus aureus	GCA_003354805.1	PRJNA393749	Complete Genome	X
Staphylococcus aureus	GCA_000967405.1	PRJEA71355	Complete Genome	O
Staphylococcus aureus	GCA_900474675.1	PRJEB6403	Complete Genome	X
Staphylococcus aureus	GCA_008935935.1	PRJNA470993	Complete Genome	O
Staphylococcus aureus	GCA_004193875.1	PRJNA384205	Complete Genome	X
Staphylococcus aureus	GCA_003031285.1	PRJNA411362	Complete Genome	X
Staphylococcus aureus	GCA_008938095.1	PRJNA470993	Complete Genome	O
Staphylococcus aureus	GCA_900324255.1	PRJEB25220	Complete Genome	O
Staphylococcus aureus	GCA_008936815.1	PRJNA470993	Complete Genome	O
Staphylococcus aureus	GCA_008934535.1	PRJNA470993	Complete Genome	O
Staphylococcus aureus	GCA_008935495.1	PRJNA470993	Complete Genome	O
Staphylococcus aureus	GCA_008934495.1	PRJNA470993	Complete Genome	O
Staphylococcus aureus	GCA_900324245.1	PRJEB25220	Complete Genome	O
Staphylococcus aureus	GCA_003184985.1	PRJNA435512	Complete Genome	X
Staphylococcus aureus	GCA_002089055.1	PRJNA368923	Complete Genome	O
Staphylococcus aureus	GCA_000568455.1	PRJNA237099	Complete Genome	O
Staphylococcus aureus	GCA_008936135.1	PRJNA470993	Complete Genome	O
Staphylococcus aureus	GCA_006364775.1	PRJNA231221	Complete Genome	O
Staphylococcus aureus	GCA_008934005.1	PRJNA470993	Complete Genome	O
Staphylococcus aureus	GCA_008370815.1	PRJNA555368	Complete Genome	O
Staphylococcus aureus	GCA_001027045.1	PRJNA284222	Complete Genome	X
Staphylococcus aureus	GCA_003991015.1	PRJNA471840	Complete Genome	O
Staphylococcus aureus	GCA_900324415.1	PRJEB25220	Complete Genome	O
Staphylococcus aureus	GCA_001281145.1	PRJNA270620	Complete Genome	X
Staphylococcus aureus	GCA_006094915.1	PRJNA514950	Complete Genome	X
Staphylococcus aureus	GCA_004153345.1	PRJNA520811	Complete Genome	O
Staphylococcus aureus	GCA_000013425.1	PRJNA237	Complete Genome	X
Staphylococcus aureus	GCA_001515665.1	PRJNA288680	Complete Genome	O
Staphylococcus aureus	GCA_001298325.2	PRJNA293604	Complete Genome	O
Staphylococcus aureus	GCA_013187685.1	PRJNA392199	Complete Genome	X
Staphylococcus aureus	GCA_001465635.1	PRJNA305475	Complete Genome	O
Staphylococcus aureus	GCA_900324265.1	PRJEB25220	Complete Genome	O
Staphylococcus aureus	GCA_900607245.1	PRJEB29322	Complete Genome	O
Staphylococcus aureus	GCA_003945425.1	PRJDB7606	Complete Genome	O
Staphylococcus aureus	GCA_900323955.1	PRJEB25360	Complete Genome	X
Staphylococcus aureus	GCA_001611325.1	PRJNA298753	Complete Genome	X
Staphylococcus aureus	GCA_009913055.1	PRJNA528186	Complete Genome	X
Staphylococcus aureus	GCA_007726325.1	PRJNA555718	Complete Genome	X
Staphylococcus aureus	GCA_008936675.1	PRJNA470993	Complete Genome	O
Staphylococcus aureus	GCA_900323925.1	PRJEB25360	Complete Genome	X
Staphylococcus aureus	GCA_001019535.2	PRJNA231221	Complete Genome	O
Staphylococcus aureus	GCA_002633825.1	PRJNA243331	Complete Genome	X
Staphylococcus aureus	GCA_003073755.1	PRJNA316321	Complete Genome	O
Staphylococcus aureus	GCA_900324305.1	PRJEB25220	Complete Genome	O
Staphylococcus aureus	GCA_009911835.1	PRJNA528186	Complete Genome	X
Staphylococcus aureus	GCA_008936575.1	PRJNA470993	Complete Genome	O
Staphylococcus aureus	GCA_009913135.1	PRJNA528186	Complete Genome	O
Staphylococcus aureus	GCA_003354665.1	PRJNA393749	Complete Genome	O
Staphylococcus aureus	GCA_000452385.2	PRJNA213989	Complete Genome	X
Staphylococcus aureus	GCA_009912655.1	PRJNA528186	Complete Genome	X
Staphylococcus aureus	GCA_001019395.2	PRJNA231221	Complete Genome	O
Staphylococcus aureus	GCA_000009585.1	PRJEA29427	Complete Genome	O
Staphylococcus aureus	GCA_008934375.1	PRJNA470993	Complete Genome	O
Staphylococcus aureus	GCA_008936855.1	PRJNA470993	Complete Genome	O
Staphylococcus aureus	GCA_001640885.1	PRJNA285271	Complete Genome	O
Staphylococcus aureus	GCA_900474715.1	PRJEB6403	Complete Genome	X
Staphylococcus aureus	GCA_003031425.1	PRJNA243331	Complete Genome	X
Staphylococcus aureus	GCA_008934915.1	PRJNA470993	Complete Genome	O
Staphylococcus aureus	GCA_008934215.1	PRJNA470993	Complete Genome	O
Staphylococcus aureus	GCA_009912835.1	PRJNA528186	Complete Genome	X
Staphylococcus aureus	GCA_000159535.2	PRJNA31539	Complete Genome	O
Staphylococcus aureus	GCA_003431365.1	PRJNA480016	Complete Genome	O
Staphylococcus aureus	GCA_000695215.1	PRJNA246435	Complete Genome	O
Staphylococcus aureus	GCA_009913075.1	PRJNA528186	Complete Genome	X
Staphylococcus aureus	GCA_001956755.1	PRJNA353940	Complete Genome	X
Staphylococcus aureus	GCA_900324235.1	PRJEB25220	Complete Genome	O
Staphylococcus aureus	GCA_900607305.1	PRJEB29322	Complete Genome	O
Staphylococcus aureus	GCA_008937635.1	PRJNA470993	Complete Genome	O
Staphylococcus aureus	GCA_000017085.1	PRJNA19489	Complete Genome	O
Staphylococcus aureus	GCA_013003945.1	PRJNA627323	Complete Genome	O
Staphylococcus aureus	GCA_003193665.1	PRJNA316321	Complete Genome	O
Staphylococcus aureus	GCA_001611405.1	PRJNA298722	Complete Genome	X
Staphylococcus aureus	GCA_001018775.2	PRJNA231221	Complete Genome	X
Staphylococcus aureus	GCA_008934615.1	PRJNA470993	Complete Genome	O
Staphylococcus aureus	GCA_005705815.1	PRJNA520768	Complete Genome	O
Staphylococcus aureus	GCA_004614315.1	PRJNA384212	Complete Genome	O
Staphylococcus aureus	GCA_002000745.1	PRJNA312385	Complete Genome	O
Staphylococcus aureus	GCA_003185005.1	PRJNA435575	Complete Genome	X
Staphylococcus aureus	GCA_009873335.1	PRJNA555168	Complete Genome	X
Staphylococcus aureus	GCA_009912635.1	PRJNA528186	Complete Genome	X
Staphylococcus aureus	GCA_001019485.2	PRJNA231221	Complete Genome	O
Staphylococcus aureus	GCA_008937295.1	PRJNA470993	Complete Genome	O
Staphylococcus aureus	GCA_000737615.1	PRJNA213166	Complete Genome	O
Staphylococcus aureus	GCA_001183725.2	PRJNA287791	Complete Genome	O
Staphylococcus aureus	GCA_008938075.1	PRJNA470993	Complete Genome	O
Staphylococcus aureus	GCA_012044215.1	PRJNA615759	Complete Genome	X
Staphylococcus aureus	GCA_008936795.1	PRJNA470993	Complete Genome	O
Staphylococcus aureus	GCA_002000625.1	PRJNA312385	Complete Genome	O
Staphylococcus aureus	GCA_003354885.1	PRJNA393749	Complete Genome	X
Staphylococcus aureus	GCA_001986135.1	PRJNA369164	Complete Genome	O
Staphylococcus aureus	GCA_003595445.1	PRJNA312385	Complete Genome	O
Staphylococcus aureus	GCA_008935735.1	PRJNA470993	Complete Genome	O
Staphylococcus aureus	GCA_002786465.1	PRJNA392813	Complete Genome	X
Staphylococcus aureus	GCA_001717725.2	PRJNA321054	Complete Genome	O
Staphylococcus aureus	GCA_008935795.1	PRJNA470993	Complete Genome	O
Staphylococcus aureus	GCA_007185035.1	PRJDB8385	Complete Genome	O
Staphylococcus aureus	GCA_008934575.1	PRJNA470993	Complete Genome	O
Staphylococcus aureus	GCA_008935295.1	PRJNA470993	Complete Genome	O
Staphylococcus aureus	GCA_900474735.1	PRJEB6403	Complete Genome	O
Staphylococcus aureus	GCA_008934635.1	PRJNA470993	Complete Genome	O
Staphylococcus aureus	GCA_008934255.1	PRJNA470993	Complete Genome	O
Staphylococcus aureus	GCA_000027045.1	PRJEA36647	Complete Genome	O
Staphylococcus aureus	GCA_008934195.1	PRJNA470993	Complete Genome	O
Staphylococcus aureus	GCA_001558795.2	PRJNA231221	Complete Genome	X
Staphylococcus aureus	GCA_900324335.1	PRJEB25220	Complete Genome	O
Staphylococcus aureus	GCA_900635905.1	PRJEB6403	Complete Genome	O
Staphylococcus aureus	GCA_000253135.1	PRJEA52833	Complete Genome	X
Staphylococcus aureus	GCA_008936075.1	PRJNA470993	Complete Genome	O
Staphylococcus aureus	GCA_009937785.1	PRJNA528186	Complete Genome	X
Staphylococcus aureus	GCA_008936055.1	PRJNA470993	Complete Genome	O
Staphylococcus aureus	GCA_003073655.1	PRJNA316321	Complete Genome	O
Staphylococcus aureus	GCA_009912795.1	PRJNA528186	Complete Genome	X
Staphylococcus aureus	GCA_003031485.1	PRJNA378176	Complete Genome	O
Staphylococcus aureus	GCA_000013465.1	PRJNA16313	Complete Genome	O
Staphylococcus aureus	GCA_001611365.1	PRJNA298756	Complete Genome	X
Staphylococcus aureus	GCA_000009665.1	PRJNA263	Complete Genome	O
Staphylococcus aureus	GCA_009731595.1	PRJDB5453	Complete Genome	X
Staphylococcus aureus	GCA_001019275.2	PRJNA231221	Complete Genome	X
Staphylococcus aureus	GCA_008935315.1	PRJNA470993	Complete Genome	O
Staphylococcus aureus	GCA_003193705.1	PRJNA316321	Complete Genome	O
Staphylococcus aureus	GCA_008934175.1	PRJNA470993	Complete Genome	O
Staphylococcus aureus	GCA_008934335.1	PRJNA470993	Complete Genome	O
Staphylococcus aureus	GCA_009912775.1	PRJNA528186	Complete Genome	X
Staphylococcus aureus	GCA_001019205.2	PRJNA231221	Complete Genome	O
Staphylococcus aureus	GCA_000189455.3	PRJNA62081	Complete Genome	X
Staphylococcus aureus	GCA_005707215.1	PRJNA520768	Complete Genome	O
Staphylococcus aureus	GCA_008936215.1	PRJNA470993	Complete Genome	O
Staphylococcus aureus	GCA_002214665.1	PRJNA326817	Complete Genome	O
Staphylococcus aureus	GCA_008935415.1	PRJNA470993	Complete Genome	O
Staphylococcus aureus	GCA_004026165.1	PRJNA498007	Complete Genome	O
Staphylococcus aureus	GCA_009176765.1	PRJDB8056	Complete Genome	O
Staphylococcus aureus	GCA_003595365.1	PRJNA312385	Complete Genome	O
Staphylococcus aureus	GCA_008934775.1	PRJNA470993	Complete Genome	O
Staphylococcus aureus	GCA_900474565.1	PRJEB6403	Complete Genome	X
Staphylococcus aureus	GCA_003264775.1	PRJNA438470	Complete Genome	O
Staphylococcus aureus	GCA_900474535.1	PRJEB6403	Complete Genome	X
Staphylococcus aureus	GCA_900324205.1	PRJEB25220	Complete Genome	O
Staphylococcus aureus	GCA_008936715.1	PRJNA470993	Complete Genome	O
Staphylococcus aureus	GCA_004771515.1	PRJNA490898	Complete Genome	X
Staphylococcus aureus	GCA_008934075.1	PRJNA470993	Complete Genome	O
Staphylococcus aureus	GCA_000284535.1	PRJEA71279	Complete Genome	O
Staphylococcus aureus	GCA_009912975.1	PRJNA528186	Complete Genome	O
Staphylococcus aureus	GCA_001879545.1	PRJNA301211	Complete Genome	X
Staphylococcus aureus	GCA_008936515.1	PRJNA470993	Complete Genome	O
Staphylococcus aureus	GCA_003425545.1	PRJNA393749	Complete Genome	X
Staphylococcus aureus	GCA_001296985.1	PRJNA270571	Complete Genome	O
Staphylococcus aureus	GCA_003595485.1	PRJNA312385	Complete Genome	O
Staphylococcus aureus	GCA_001018835.2	PRJNA231221	Complete Genome	O
Staphylococcus aureus	GCA_900324275.1	PRJEB25220	Complete Genome	O
Staphylococcus aureus	GCA_000418345.1	PRJNA196937	Complete Genome	O
Staphylococcus aureus	GCA_003073775.1	PRJNA316321	Complete Genome	O
Staphylococcus aureus	GCA_003425885.1	PRJNA393749	Complete Genome	X
Staphylococcus aureus	GCA_006158985.1	PRJNA545780	Complete Genome	O
Staphylococcus aureus	GCA_003595465.1	PRJNA312385	Complete Genome	O
Staphylococcus aureus	GCA_008936635.1	PRJNA470993	Complete Genome	O
Staphylococcus aureus	GCA_008936535.1	PRJNA470993	Complete Genome	O
Staphylococcus aureus	GCA_008619935.1	PRJDB8599	Complete Genome	O
Staphylococcus aureus	GCA_008462245.1	PRJNA542127	Complete Genome	X
Staphylococcus aureus	GCA_008934095.1	PRJNA470993	Complete Genome	O
Staphylococcus aureus	GCA_009911815.1	PRJNA528186	Complete Genome	X
Staphylococcus aureus	GCA_004772215.1	PRJNA528119	Complete Genome	X
Staphylococcus aureus	GCA_003193685.1	PRJNA316321	Complete Genome	O
Staphylococcus aureus	GCA_900635505.1	PRJEB6403	Complete Genome	X
Staphylococcus aureus	GCA_004208595.1	PRJNA515949	Complete Genome	O
Staphylococcus aureus	GCA_003194025.1	PRJNA316321	Complete Genome	O
Staphylococcus aureus	GCA_002209325.1	PRJNA338099	Complete Genome	X
Staphylococcus aureus	GCA_003073715.1	PRJNA316321	Complete Genome	O
Staphylococcus aureus	GCA_008934855.1	PRJNA470993	Complete Genome	O
Staphylococcus aureus	GCA_000462955.1	PRJNA216988	Complete Genome	X
Staphylococcus aureus	GCA_008935435.1	PRJNA470993	Complete Genome	O
Staphylococcus aureus	GCA_007954445.1	PRJNA544229	Complete Genome	O
Staphylococcus aureus	GCA_900635265.1	PRJEB6403	Complete Genome	O
Staphylococcus aureus	GCA_008935875.1	PRJNA470993	Complete Genome	O
Staphylococcus aureus	GCA_001717705.2	PRJNA321120	Complete Genome	O
Staphylococcus aureus	GCA_009912355.1	PRJNA528186	Complete Genome	X
Staphylococcus aureus	GCA_003203615.1	PRJNA316321	Complete Genome	O
Staphylococcus aureus	GCA_003029645.1	PRJNA243331	Complete Genome	O
Staphylococcus aureus	GCA_003432365.1	PRJNA487590	Complete Genome	O
Staphylococcus aureus	GCA_009739675.1	PRJNA503808	Complete Genome	O
Staphylococcus aureus	GCA_900324315.1	PRJEB25220	Complete Genome	O
Staphylococcus aureus	GCA_011032785.1	PRJNA604579	Complete Genome	X
Staphylococcus aureus	GCA_002000665.1	PRJNA312385	Complete Genome	O
Staphylococcus aureus	GCA_008936235.1	PRJNA470993	Complete Genome	O
Staphylococcus aureus	GCA_008934115.1	PRJNA470993	Complete Genome	O
Staphylococcus aureus	GCA_000237265.1	PRJEA62883	Complete Genome	O
Staphylococcus aureus	GCA_004368035.1	PRJNA433086	Complete Genome	O
Staphylococcus aureus	GCA_003193745.1	PRJNA316321	Complete Genome	O
Staphylococcus aureus	GCA_000382985.1	PRJEA71351	Complete Genome	O
Staphylococcus aureus	GCA_008935355.1	PRJNA470993	Complete Genome	O
Staphylococcus aureus	GCA_000815205.1	PRJNA268517	Complete Genome	O
Staphylococcus aureus	GCA_006364675.1	PRJNA231221	Complete Genome	X
Staphylococcus aureus	GCA_008934975.1	PRJNA470993	Complete Genome	O
Staphylococcus aureus	GCA_900620255.1	PRJEB29881	Complete Genome	O
Staphylococcus aureus	GCA_013046865.1	PRJNA630298	Complete Genome	O
Staphylococcus aureus	GCA_008934395.1	PRJNA470993	Complete Genome	O
Staphylococcus aureus	GCA_000815125.1	PRJNA268517	Complete Genome	O
Staphylococcus aureus	GCA_003347055.1	PRJNA395147	Complete Genome	X
Staphylococcus aureus	GCA_008936435.1	PRJNA470993	Complete Genome	O
Staphylococcus aureus	GCA_003354865.1	PRJNA393749	Complete Genome	X
Staphylococcus aureus	GCA_009912455.1	PRJNA528186	Complete Genome	X
Staphylococcus aureus	GCA_003194405.1	PRJNA378176	Complete Genome	O
Staphylococcus aureus	GCA_008935175.1	PRJNA470993	Complete Genome	O
Staphylococcus aureus	GCA_009912855.1	PRJNA528186	Complete Genome	X
Staphylococcus aureus	GCA_002633845.1	PRJNA243331	Complete Genome	X
Staphylococcus aureus	GCA_008934715.1	PRJNA470993	Complete Genome	O
Staphylococcus aureus	GCA_900474575.1	PRJEB6403	Complete Genome	O
Staphylococcus aureus	GCA_008935675.1	PRJNA470993	Complete Genome	O
Staphylococcus aureus	GCA_009739885.1	PRJNA503808	Complete Genome	O
Staphylococcus aureus	GCA_900620225.1	PRJEB29881	Complete Genome	X
Staphylococcus aureus	GCA_002633865.1	PRJNA243331	Complete Genome	X
Staphylococcus aureus	GCA_008936175.1	PRJNA470993	Complete Genome	O
Staphylococcus aureus	GCA_007954465.1	PRJNA544229	Complete Genome	O
Staphylococcus aureus	GCA_000709475.1	PRJNA239544	Complete Genome	O
Staphylococcus aureus	GCA_001549675.1	PRJDB3193	Complete Genome	O
Staphylococcus aureus	GCA_001594205.1	PRJNA39571	Complete Genome	X
Staphylococcus aureus	GCA_001640925.1	PRJNA300829	Complete Genome	O
Staphylococcus aureus	GCA_900635335.1	PRJEB6403	Complete Genome	X
Staphylococcus aureus	GCA_008935815.1	PRJNA470993	Complete Genome	O
Staphylococcus aureus	GCA_009912195.1	PRJNA528186	Complete Genome	X
Staphylococcus aureus	GCA_004772175.1	PRJNA528010	Complete Genome	X
Staphylococcus aureus	GCA_000204665.1	PRJNA65323	Complete Genome	O
Staphylococcus aureus	GCA_009739775.1	PRJNA503808	Complete Genome	O
Staphylococcus aureus	GCA_003609855.1	PRJDB5203	Complete Genome	X
Staphylococcus aureus	GCA_900620235.1	PRJEB29881	Complete Genome	O
Staphylococcus aureus	GCA_008619075.1	PRJDB8599	Complete Genome	O
Staphylococcus aureus	GCA_001717665.2	PRJNA321119	Complete Genome	X
Staphylococcus aureus	GCA_001900185.1	PRJNA355085	Complete Genome	X
Staphylococcus aureus	GCA_002025125.1	PRJNA378150	Complete Genome	O
Staphylococcus aureus	GCA_001018725.2	PRJNA231221	Complete Genome	X
Staphylococcus aureus	GCA_013046885.1	PRJNA630298	Complete Genome	O
Staphylococcus aureus	GCA_007410625.1	PRJNA544229	Complete Genome	O
Staphylococcus aureus	GCA_008934315.1	PRJNA470993	Complete Genome	O
Staphylococcus aureus	GCA_008934055.1	PRJNA470993	Complete Genome	O
Staphylococcus aureus	GCA_008934435.1	PRJNA470993	Complete Genome	O
Staphylococcus aureus	GCA_008936415.1	PRJNA470993	Complete Genome	O
Staphylococcus aureus	GCA_008936695.1	PRJNA470993	Complete Genome	O
Staphylococcus aureus	GCA_001465755.1	PRJNA305475	Complete Genome	O
Staphylococcus aureus	GCA_009911895.1	PRJNA528186	Complete Genome	X
Staphylococcus aureus	GCA_000024585.1	PRJNA39547	Complete Genome	X
Staphylococcus aureus	GCA_003945405.1	PRJDB7606	Complete Genome	X
Staphylococcus aureus	GCA_009728755.1	PRJNA497214	Complete Genome	X
Staphylococcus aureus	GCA_900324285.1	PRJEB25220	Complete Genome	O
Staphylococcus aureus	GCA_001018655.2	PRJNA231221	Complete Genome	X
Staphylococcus aureus	GCA_001641025.1	PRJNA300829	Complete Genome	O
Staphylococcus aureus	GCA_008935635.1	PRJNA470993	Complete Genome	O
Staphylococcus aureus	GCA_004797195.1	PRJNA490548	Complete Genome	X
Staphylococcus aureus	GCA_009912495.1	PRJNA528186	Complete Genome	X
Staphylococcus aureus	GCA_009912955.1	PRJNA528186	Complete Genome	X
Staphylococcus aureus	GCA_900324065.1	PRJEB25360	Complete Genome	X
Staphylococcus aureus	GCA_900636395.1	PRJEB6403	Complete Genome	X
Staphylococcus aureus	GCA_900092595.1	PRJEB14381	Complete Genome	X
Staphylococcus aureus	GCA_004614295.1	PRJNA384204	Complete Genome	O
Staphylococcus aureus	GCA_008935375.1	PRJNA470993	Complete Genome	O
Staphylococcus aureus	GCA_001278745.1	PRJNA294307	Complete Genome	X
Staphylococcus aureus	GCA_001019435.2	PRJNA231221	Complete Genome	O
Staphylococcus aureus	GCA_008936115.1	PRJNA470993	Complete Genome	O
Staphylococcus aureus	GCA_009912715.1	PRJNA528186	Complete Genome	X
Staphylococcus aureus	GCA_009913155.1	PRJNA528186	Complete Genome	O
Staphylococcus aureus	GCA_005931035.1	PRJNA541968	Complete Genome	X
Staphylococcus aureus	GCA_005890035.1	PRJNA544229	Complete Genome	O
Staphylococcus aureus	GCA_003264815.1	PRJNA438472	Complete Genome	O
Staphylococcus aureus	GCA_002952015.1	PRJNA376656	Complete Genome	X
Staphylococcus aureus	GCA_008934275.1	PRJNA470993	Complete Genome	O
Staphylococcus aureus	GCA_008935755.1	PRJNA470993	Complete Genome	O
Staphylococcus aureus	GCA_003426145.1	PRJNA393749	Complete Genome	X
Staphylococcus aureus	GCA_000009645.1	PRJNA264	Complete Genome	O
Staphylococcus aureus	GCA_004785995.1	PRJNA531521	Complete Genome	O
Staphylococcus aureus	GCA_001515685.1	PRJNA286121	Complete Genome	O
Staphylococcus aureus	GCA_001735655.2	PRJNA321117	Complete Genome	O
Staphylococcus aureus	GCA_900635305.1	PRJEB6403	Complete Genome	X
Staphylococcus aureus	GCA_009912335.1	PRJNA528186	Complete Genome	X
Staphylococcus aureus	GCA_008935195.1	PRJNA470993	Complete Genome	O
Staphylococcus aureus	GCA_003425835.1	PRJNA393749	Complete Genome	X
Staphylococcus aureus	GCA_008934135.1	PRJNA470993	Complete Genome	O
Staphylococcus aureus	GCA_001549655.1	PRJDB3193	Complete Genome	O
Staphylococcus aureus	GCA_008936195.1	PRJNA470993	Complete Genome	O
Staphylococcus aureus	GCA_003111725.1	PRJNA454172	Complete Genome	O
Staphylococcus aureus	GCA_900607285.1	PRJEB29322	Complete Genome	O
Staphylococcus aureus	GCA_900474555.1	PRJEB6403	Complete Genome	X
Staphylococcus aureus	GCA_009650155.1	PRJNA541975	Complete Genome	X
Staphylococcus aureus	GCA_008934755.1	PRJNA470993	Complete Genome	O
Staphylococcus aureus	GCA_000463055.1	PRJNA162343	Complete Genome	O
Staphylococcus aureus	GCA_008619235.1	PRJDB8599	Complete Genome	O
Staphylococcus aureus	GCA_008934655.1	PRJNA470993	Complete Genome	O
Staphylococcus aureus	GCA_000828035.1	PRJNA270689	Complete Genome	O
Staphylococcus aureus	GCA_900620215.1	PRJEB29881	Complete Genome	X
Staphylococcus aureus	GCA_008936275.1	PRJNA470993	Complete Genome	O
Staphylococcus aureus	GCA_008934995.1	PRJNA470993	Complete Genome	O
Staphylococcus aureus	GCA_009912115.1	PRJNA528186	Complete Genome	X
Staphylococcus aureus	GCA_900324365.1	PRJEB25220	Complete Genome	O
Staphylococcus aureus	GCA_003111745.1	PRJNA454185	Complete Genome	O
Staphylococcus aureus	GCA_008935835.1	PRJNA470993	Complete Genome	O
Staphylococcus aureus	GCA_000016805.1	PRJNA15757	Complete Genome	O
Staphylococcus aureus	GCA_008934155.1	PRJNA470993	Complete Genome	O
Staphylococcus aureus	GCA_009912935.1	PRJNA528186	Complete Genome	X
Staphylococcus aureus	GCA_001021895.1	PRJNA246386	Complete Genome	O
Staphylococcus aureus	GCA_000012045.1	PRJNA238	Complete Genome	O
Staphylococcus aureus	GCA_001465675.1	PRJNA305475	Complete Genome	O
Staphylococcus aureus	GCA_003203635.1	PRJNA316321	Complete Genome	O
Staphylococcus aureus	GCA_008937415.1	PRJNA470993	Complete Genome	O
Staphylococcus aureus	GCA_008935955.1	PRJNA470993	Complete Genome	O
Staphylococcus aureus	GCA_002088995.1	PRJNA345240	Complete Genome	O
Staphylococcus aureus	GCA_001548415.1	PRJDB4467	Complete Genome	O
Staphylococcus aureus	GCA_900475055.1	PRJEB6403	Complete Genome	X
Staphylococcus aureus	GCA_002442975.1	PRJNA382289	Complete Genome	O
Staphylococcus aureus	GCA_008934735.1	PRJNA470993	Complete Genome	O
Staphylococcus aureus	GCA_001027105.1	PRJNA283471	Complete Genome	X
Staphylococcus aureus	GCA_003342735.1	PRJNA481439	Complete Genome	O
Staphylococcus aureus	GCA_008936095.1	PRJNA470993	Complete Genome	O
Staphylococcus aureus	GCA_003073435.1	PRJNA451172	Complete Genome	O
Staphylococcus aureus	GCA_003193765.1	PRJNA316321	Complete Genome	O
Staphylococcus aureus	GCA_001183705.3	PRJNA287576	Complete Genome	O
Staphylococcus aureus	GCA_000470865.1	PRJNA167373	Complete Genome	O
Staphylococcus aureus	GCA_002089115.2	PRJNA368957	Complete Genome	X
Staphylococcus aureus	GCA_008935235.1	PRJNA470993	Complete Genome	O
Staphylococcus aureus	GCA_003573855.1	PRJDB7266	Complete Genome	X
Staphylococcus aureus	GCA_003194005.1	PRJNA316321	Complete Genome	O
Staphylococcus aureus	GCA_008935615.1	PRJNA470993	Complete Genome	O
Staphylococcus aureus	GCA_009912995.1	PRJNA528186	Complete Genome	O
Staphylococcus aureus	GCA_000245495.1	PRJNA66591	Complete Genome	X
Staphylococcus aureus	GCA_003394105.1	PRJNA261650	Complete Genome	O
Staphylococcus aureus	GCA_009913015.1	PRJNA528186	Complete Genome	O
Staphylococcus aureus	GCA_008244705.1	PRJNA527676	Complete Genome	O
Staphylococcus aureus	GCA_001975045.1	PRJNA354449	Complete Genome	O
Staphylococcus aureus	GCA_008938015.1	PRJNA470993	Complete Genome	O
Staphylococcus aureus	GCA_003073395.1	PRJNA451172	Complete Genome	O
Staphylococcus aureus	GCA_000485885.1	PRJNA222409	Complete Genome	O
Staphylococcus aureus	GCA_008935095.1	PRJNA470993	Complete Genome	O
Staphylococcus aureus	GCA_006088835.1	PRJNA451378	Complete Genome	O
Staphylococcus aureus	GCA_002085525.1	PRJNA381486	Complete Genome	O
Staphylococcus aureus	GCA_008935975.1	PRJNA470993	Complete Genome	O
Staphylococcus aureus	GCA_003288395.1	PRJNA316321	Complete Genome	O
Staphylococcus aureus	GCA_000967325.1	PRJEA71343	Complete Genome	O
Staphylococcus aureus	GCA_001880265.1	PRJNA302097	Complete Genome	O
Staphylococcus aureus	GCA_002000605.1	PRJNA312385	Complete Genome	O
Staphylococcus aureus	GCA_008935695.1	PRJNA470993	Complete Genome	O
Staphylococcus aureus	GCA_000756205.1	PRJNA259557	Complete Genome	X
Staphylococcus aureus	GCA_008936455.1	PRJNA470993	Complete Genome	O
Staphylococcus aureus	GCA_009912075.1	PRJNA528186	Complete Genome	X
Staphylococcus aureus	GCA_001975005.1	PRJNA354450	Complete Genome	O
Staphylococcus aureus	GCA_001548295.1	PRJDB4160	Complete Genome	X
Staphylococcus aureus	GCA_002204555.1	PRJNA315882	Complete Genome	O
Staphylococcus aureus	GCA_009912915.1	PRJNA528186	Complete Genome	X
Staphylococcus aureus	GCA_009912675.1	PRJNA528186	Complete Genome	X
Staphylococcus aureus	GCA_009912155.1	PRJNA528186	Complete Genome	X
Staphylococcus aureus	GCA_008936495.1	PRJNA470993	Complete Genome	O
Staphylococcus aureus	GCA_008936915.1	PRJNA470993	Complete Genome	O
Staphylococcus aureus	GCA_008330045.1	PRJNA533010	Complete Genome	O
Staphylococcus aureus	GCA_008936895.1	PRJNA470993	Complete Genome	O
Staphylococcus aureus	GCA_008934695.1	PRJNA470993	Complete Genome	O
Staphylococcus aureus	GCA_003432345.1	PRJNA487590	Complete Genome	O
Staphylococcus aureus	GCA_900324295.1	PRJEB25220	Complete Genome	O
Staphylococcus aureus	GCA_900478245.1	PRJEB6403	Complete Genome	O
Staphylococcus aureus	GCA_000967345.1	PRJEA71345	Complete Genome	O
Staphylococcus aureus	GCA_003193785.1	PRJNA316321	Complete Genome	O
Staphylococcus aureus	GCA_009769095.1	PRJNA564722	Complete Genome	X
Staphylococcus aureus	GCA_009911855.1	PRJNA528186	Complete Genome	X
Staphylococcus aureus	GCA_009913095.1	PRJNA528186	Complete Genome	O
Staphylococcus aureus	GCA_004153365.1	PRJNA520817	Complete Genome	O
Staphylococcus aureus	GCA_002795285.1	PRJNA345484	Complete Genome	O
Staphylococcus aureus	GCA_004118995.1	PRJNA515948	Complete Genome	O
Staphylococcus aureus	GCA_900324325.1	PRJEB25220	Complete Genome	O
Staphylococcus aureus	GCA_002089095.2	PRJNA368959	Complete Genome	X
Staphylococcus aureus	GCA_000296595.1	PRJNA174226	Complete Genome	O
Staphylococcus aureus	GCA_900474695.1	PRJEB6403	Complete Genome	X
Staphylococcus aureus	GCA_008244745.1	PRJNA527676	Complete Genome	O
Staphylococcus aureus	GCA_003010875.1	PRJNA379058	Complete Genome	X
Staphylococcus aureus	GCA_011035105.1	PRJNA596097	Complete Genome	O
Staphylococcus aureus	GCA_003354985.1	PRJNA393749	Complete Genome	O
Staphylococcus aureus	GCA_008935115.1	PRJNA470993	Complete Genome	O
Staphylococcus aureus	GCA_007726465.1	PRJNA555718	Complete Genome	X
Staphylococcus aureus	GCA_001018645.2	PRJNA231221	Complete Genome	X
Staphylococcus aureus	GCA_001456215.1	PRJNA263760	Complete Genome	O
Staphylococcus aureus	GCA_001018975.2	PRJNA231221	Complete Genome	X
Staphylococcus aureus	GCA_008935555.1	PRJNA470993	Complete Genome	O
Staphylococcus aureus	GCA_009739695.1	PRJNA503808	Complete Genome	O
Staphylococcus aureus	GCA_009912095.1	PRJNA528186	Complete Genome	X
Staphylococcus aureus	GCA_008934955.1	PRJNA470993	Complete Genome	O
Staphylococcus aureus	GCA_003203675.1	PRJNA316321	Complete Genome	O
Staphylococcus aureus	GCA_008934895.1	PRJNA470993	Complete Genome	O
Staphylococcus aureus	GCA_003030065.1	PRJNA243331	Complete Genome	O
Staphylococcus aureus	GCA_002000565.1	PRJNA312385	Complete Genome	O
Staphylococcus aureus	GCA_005890015.1	PRJNA544229	Complete Genome	O
Staphylococcus aureus	GCA_001018735.2	PRJNA231221	Complete Genome	X
Staphylococcus aureus	GCA_008936295.1	PRJNA470993	Complete Genome	O
Staphylococcus aureus	GCA_008936835.1	PRJNA470993	Complete Genome	O
Staphylococcus aureus	GCA_008937855.1	PRJNA470993	Complete Genome	O
Staphylococcus aureus	GCA_003330905.1	PRJNA316321	Complete Genome	O
Staphylococcus aureus	GCA_001021875.1	PRJNA246311	Complete Genome	O
Staphylococcus aureus	GCA_001515765.1	PRJNA288686	Complete Genome	O
Staphylococcus aureus	GCA_900324385.1	PRJEB25220	Complete Genome	O
Staphylococcus aureus	GCA_009914455.1	PRJNA577395	Complete Genome	O
Staphylococcus aureus	GCA_004772055.1	PRJNA528514	Complete Genome	X
Staphylococcus aureus	GCA_008620175.1	PRJDB8599	Complete Genome	X
Staphylococcus aureus	GCA_004026185.1	PRJNA498007	Complete Genome	O
Staphylococcus aureus	GCA_009739735.1	PRJNA503808	Complete Genome	O
Staphylococcus aureus	GCA_001656045.1	PRJNA321000	Complete Genome	X
Staphylococcus aureus	GCA_001515745.1	PRJNA288685	Complete Genome	O
Staphylococcus aureus	GCA_008935275.1	PRJNA470993	Complete Genome	O
Staphylococcus aureus	GCA_900474755.1	PRJEB6403	Complete Genome	X
Staphylococcus aureus	GCA_000011265.1	PRJNA306	Complete Genome	O
Staphylococcus aureus	GCA_000144955.1	PRJNA50759	Complete Genome	O
Staphylococcus aureus	GCA_008934595.1	PRJNA470993	Complete Genome	O
Staphylococcus aureus	GCA_005931055.1	PRJNA542129	Complete Genome	X
Staphylococcus aureus	GCA_012974825.1	PRJNA529045	Complete Genome	X
Staphylococcus aureus	GCA_002895385.1	PRJNA357000	Complete Genome	O
Staphylococcus aureus	GCA_001887075.1	PRJNA302644	Complete Genome	O
Staphylococcus aureus	GCA_005889995.1	PRJNA544229	Complete Genome	O
Staphylococcus aureus	GCA_008935655.1	PRJNA470993	Complete Genome	O
Staphylococcus aureus	GCA_005707335.1	PRJNA520768	Complete Genome	O
Staphylococcus aureus	GCA_003351925.1	PRJNA395485	Complete Genome	O
Staphylococcus aureus	GCA_003827915.1	PRJNA231221	Complete Genome	O
Staphylococcus aureus	GCA_003186125.1	PRJNA472939	Complete Genome	X
Staphylococcus aureus	GCA_002000705.1	PRJNA312385	Complete Genome	O
Staphylococcus aureus	GCA_003354945.1	PRJNA393749	Complete Genome	O
Staphylococcus aureus	GCA_008935595.1	PRJNA470993	Complete Genome	O
Staphylococcus aureus	GCA_005931015.1	PRJNA541965	Complete Genome	X
Staphylococcus aureus	GCA_900635095.1	PRJEB6403	Complete Genome	X
Staphylococcus aureus	GCA_007726495.1	PRJNA555718	Complete Genome	X
Staphylococcus aureus	GCA_900607255.1	PRJEB29322	Complete Genome	O
Staphylococcus aureus	GCA_008935895.1	PRJNA470993	Complete Genome	O
Staphylococcus aureus	GCA_009728775.1	PRJNA497221	Complete Genome	X
Staphylococcus aureus	GCA_900096745.1	PRJEB15428	Complete Genome	X
Staphylococcus aureus	GCA_003193885.1	PRJNA316321	Complete Genome	O
Staphylococcus aureus	GCA_001019255.2	PRJNA231221	Complete Genome	O
Staphylococcus aureus	GCA_002140115.1	PRJNA321478	Complete Genome	O
Staphylococcus aureus	GCA_008619795.1	PRJDB8599	Complete Genome	X
Staphylococcus aureus	GCA_002310435.1	PRJNA406184	Complete Genome	X
Staphylococcus aureus	GCA_008619595.1	PRJDB8599	Complete Genome	X
Staphylococcus aureus	GCA_004771975.1	PRJNA529247	Complete Genome	X
Staphylococcus aureus	GCA_001019125.2	PRJNA231221	Complete Genome	O
Staphylococcus aureus	GCA_003010475.1	PRJNA436877	Complete Genome	O
Staphylococcus aureus	GCA_008934355.1	PRJNA470993	Complete Genome	O
Staphylococcus aureus	GCA_004771335.1	PRJNA523422	Complete Genome	X
Staphylococcus aureus	GCA_005707015.1	PRJNA520768	Complete Genome	O
Staphylococcus aureus	GCA_002633785.1	PRJNA243331	Complete Genome	X
Staphylococcus aureus	GCA_009912615.1	PRJNA528186	Complete Genome	X
Staphylococcus aureus	GCA_008936355.1	PRJNA470993	Complete Genome	O
Staphylococcus aureus	GCA_008935335.1	PRJNA470993	Complete Genome	O
Staphylococcus aureus	GCA_001457495.1	PRJEB6403	Complete Genome	O
Staphylococcus aureus	GCA_000695875.1	PRJNA246435	Complete Genome	O
Staphylococcus aureus	GCA_008936615.1	PRJNA470993	Complete Genome	O
Staphylococcus aureus	GCA_000010445.1	PRJDA18509	Complete Genome	O
Staphylococcus aureus	GCA_003354685.1	PRJNA393749	Complete Genome	X
Staphylococcus aureus	GCA_001018915.2	PRJNA231221	Complete Genome	X
Staphylococcus aureus	GCA_900636335.1	PRJEB6403	Complete Genome	X
Staphylococcus aureus	GCA_008936315.1	PRJNA470993	Complete Genome	O
Staphylococcus aureus	GCA_008935135.1	PRJNA470993	Complete Genome	O
Staphylococcus aureus	GCA_000746505.1	PRJNA240091	Complete Genome	O
Staphylococcus aureus	GCA_003827835.1	PRJNA480363	Complete Genome	O
Staphylococcus aureus	GCA_003203595.1	PRJNA316321	Complete Genome	O
Staphylococcus aureus	GCA_009912735.1	PRJNA528186	Complete Genome	X
Staphylococcus aureus	GCA_008935255.1	PRJNA470993	Complete Genome	O
Staphylococcus aureus	GCA_008934835.1	PRJNA470993	Complete Genome	O
Staphylococcus aureus	GCA_007998145.1	PRJNA558859	Complete Genome	X
Staphylococcus aureus	GCA_003354725.1	PRJNA393749	Complete Genome	X
Staphylococcus aureus	GCA_900474725.1	PRJEB6403	Complete Genome	O
Staphylococcus aureus	GCA_000383005.1	PRJEA71357	Complete Genome	O
Staphylococcus aureus	GCA_003193965.1	PRJNA316321	Complete Genome	O
Staphylococcus aureus	GCA_900607265.1	PRJEB29322	Complete Genome	O
Staphylococcus aureus	GCA_008935395.1	PRJNA470993	Complete Genome	O
Staphylococcus aureus	GCA_003627835.1	PRJNA490784	Complete Genome	X
Staphylococcus aureus	GCA_000815045.1	PRJNA268517	Complete Genome	O
Staphylococcus aureus	GCA_900129335.1	PRJEB18112	Complete Genome	O
Staphylococcus aureus	GCA_003354905.1	PRJNA393749	Complete Genome	X
Staphylococcus aureus	GCA_000953255.1	PRJEB6577	Complete Genome	X
Staphylococcus aureus	GCA_900474525.1	PRJEB6403	Complete Genome	O
Staphylococcus aureus	GCA_000017125.1	PRJNA15758	Complete Genome	O
Staphylococcus aureus	GCA_008936655.1	PRJNA470993	Complete Genome	O
Staphylococcus aureus	GCA_003354925.1	PRJNA393749	Complete Genome	X
Staphylococcus aureus	GCA_005706855.1	PRJNA520768	Complete Genome	O
Staphylococcus aureus	GCA_003354785.1	PRJNA393749	Complete Genome	X
Staphylococcus aureus	GCA_002356675.1	PRJDB4003	Complete Genome	O
Staphylococcus aureus	GCA_009912295.1	PRJNA528186	Complete Genome	X
Staphylococcus aureus	GCA_007826355.1	PRJNA548666	Complete Genome	X
Staphylococcus aureus	GCA_003030085.1	PRJNA243331	Complete Genome	O
Staphylococcus aureus	GCA_001580495.1	PRJNA277068	Complete Genome	O
Staphylococcus aureus	GCA_002025145.1	PRJNA378149	Complete Genome	X
Staphylococcus aureus	GCA_000967365.1	PRJEA71347	Complete Genome	O
Staphylococcus aureus	GCA_008936475.1	PRJNA470993	Complete Genome	O
Staphylococcus aureus	GCA_001618305.1	PRJNA317948	Complete Genome	O
Staphylococcus aureus	GCA_008936875.1	PRJNA470993	Complete Genome	O
Staphylococcus aureus	GCA_009739715.1	PRJNA503808	Complete Genome	O
Staphylococcus aureus	GCA_008934415.1	PRJNA470993	Complete Genome	O
Staphylococcus aureus	GCA_013004085.1	PRJNA630031	Complete Genome	X
Staphylococcus aureus	GCA_002633805.1	PRJNA243331	Complete Genome	X
Staphylococcus aureus	GCA_008935775.1	PRJNA470993	Complete Genome	O
Staphylococcus aureus	GCA_002202075.1	PRJNA390063	Complete Genome	X
Staphylococcus aureus	GCA_008935915.1	PRJNA470993	Complete Genome	O
Staphylococcus aureus	GCA_900475245.1	PRJEB6403	Complete Genome	X
Staphylococcus aureus	GCA_003595405.1	PRJNA312385	Complete Genome	O
Staphylococcus aureus	GCA_003186105.1	PRJNA472941	Complete Genome	X
Staphylococcus aureus	GCA_900636695.1	PRJEB6403	Complete Genome	X
Staphylococcus aureus	GCA_008935575.1	PRJNA470993	Complete Genome	O
Staphylococcus aureus	GCA_000382965.1	PRJEA71349	Complete Genome	O
Staphylococcus aureus	GCA_002000585.1	PRJNA312385	Complete Genome	O
Staphylococcus aureus	GCA_002089075.2	PRJNA368953	Complete Genome	X
Staphylococcus aureus	GCA_900607295.1	PRJEB29322	Complete Genome	O
Staphylococcus aureus	GCA_001641045.1	PRJNA300829	Complete Genome	O
Staphylococcus aureus	GCA_002202095.1	PRJNA390063	Complete Genome	X
Staphylococcus aureus	GCA_009912695.1	PRJNA528186	Complete Genome	X
Staphylococcus aureus	GCA_007726545.1	PRJNA555718	Complete Genome	X
Staphylococcus aureus	GCA_004136655.1	PRJNA395641	Complete Genome	O
Staphylococcus aureus	GCA_008936595.1	PRJNA470993	Complete Genome	O
Staphylococcus aureus	GCA_900607275.1	PRJEB29322	Complete Genome	O
Staphylococcus aureus	GCA_009684655.1	PRJNA576862	Complete Genome	O
Staphylococcus aureus	GCA_001019495.2	PRJNA231221	Complete Genome	O
Staphylococcus aureus	GCA_001580515.1	PRJNA273427	Complete Genome	O
Staphylococcus aureus	GCA_009739795.1	PRJNA503808	Complete Genome	O
Staphylococcus aureus	GCA_003595505.1	PRJNA312385	Complete Genome	O
Staphylococcus aureus	GCA_008329865.1	PRJNA278886	Complete Genome	O
Staphylococcus aureus	GCA_002000765.1	PRJNA312385	Complete Genome	O
Staphylococcus aureus	GCA_008619415.1	PRJDB8599	Complete Genome	O
Staphylococcus aureus	GCA_001717975.3	PRJNA321118	Complete Genome	X
Staphylococcus aureus	GCA_000597965.1	PRJNA240093	Complete Genome	X
Staphylococcus aureus	GCA_008936155.1	PRJNA470993	Complete Genome	O
Staphylococcus aureus	GCA_009912535.1	PRJNA528186	Complete Genome	X
Staphylococcus aureus	GCA_003354585.1	PRJNA393749	Complete Genome	O
Staphylococcus aureus	GCA_000237125.3	PRJNA78007	Complete Genome	O
Staphylococcus aureus	GCA_008936555.1	PRJNA470993	Complete Genome	O
Staphylococcus aureus	GCA_008935515.1	PRJNA470993	Complete Genome	O
Staphylococcus aureus	GCA_000025145.2	PRJNA34809	Complete Genome	O
Staphylococcus aureus	GCA_000815085.1	PRJNA268517	Complete Genome	O
Staphylococcus aureus	GCA_004136235.1	PRJNA377392	Complete Genome	O
Staphylococcus aureus	GCA_005706035.1	PRJNA520768	Complete Genome	O
Staphylococcus aureus	GCA_008935015.1	PRJNA470993	Complete Genome	O
Staphylococcus aureus	GCA_000010465.1	PRJDA18801	Complete Genome	X
Staphylococcus aureus	GCA_009912895.1	PRJNA528186	Complete Genome	O
Staphylococcus aureus	GCA_003354705.1	PRJNA393749	Complete Genome	O
Staphylococcus aureus	GCA_008935715.1	PRJNA470993	Complete Genome	O
Staphylococcus aureus	GCA_003609915.1	PRJDB6169	Complete Genome	X
Staphylococcus aureus	GCA_009912015.1	PRJNA528186	Complete Genome	X
Staphylococcus aureus	GCA_008936755.1	PRJNA470993	Complete Genome	O
Staphylococcus aureus	GCA_002386245.1	PRJNA231221	Complete Genome	X
Staphylococcus aureus	GCA_009913195.1	PRJNA528186	Complete Genome	O
Staphylococcus aureus	GCA_900017775.1	PRJEB12333	Complete Genome	O
Staphylococcus aureus	GCA_009912035.1	PRJNA528186	Complete Genome	X
Staphylococcus aureus	GCA_008936395.1	PRJNA470993	Complete Genome	O
Staphylococcus aureus	GCA_009739865.1	PRJNA503808	Complete Genome	O
Staphylococcus aureus	GCA_001045795.2	PRJNA246373	Complete Genome	O
Staphylococcus aureus	GCA_008935215.1	PRJNA470993	Complete Genome	O
Staphylococcus aureus	GCA_001019305.2	PRJNA231221	Complete Genome	O
Staphylococcus aureus	GCA_008934235.1	PRJNA470993	Complete Genome	O
Staphylococcus aureus	GCA_900323905.1	PRJEB25360	Complete Genome	X
Staphylococcus aureus	GCA_002786535.1	PRJNA392815	Complete Genome	X
Staphylococcus aureus	GCA_900323965.1	PRJEB25360	Complete Genome	X
Staphylococcus aureus	GCA_003354965.1	PRJNA393749	Complete Genome	O
Staphylococcus aureus	GCA_000815245.1	PRJNA268517	Complete Genome	O
Staphylococcus aureus	GCA_001046095.2	PRJNA246185	Complete Genome	O
Staphylococcus aureus	GCA_008936255.1	PRJNA470993	Complete Genome	O
Staphylococcus aureus	GCA_002000785.1	PRJNA312385	Complete Genome	O
Staphylococcus aureus	GCA_005705635.1	PRJNA520768	Complete Genome	O
Staphylococcus aureus	GCA_900324215.1	PRJEB25220	Complete Genome	O
Staphylococcus aureus	GCA_001725965.1	PRJNA295337	Complete Genome	O
Staphylococcus aureus	GCA_003957315.1	PRJNA509312	Complete Genome	X
Staphylococcus aureus	GCA_000145595.1	PRJNA29567	Complete Genome	O
Staphylococcus aureus	GCA_900324225.1	PRJEB25220	Complete Genome	O
Staphylococcus aureus	GCA_009176875.1	PRJDB8056	Complete Genome	O
Staphylococcus aureus	GCA_008936015.1	PRJNA470993	Complete Genome	O
Staphylococcus aureus	GCA_900004855.1	PRJEB9500	Complete Genome	X
Staphylococcus aureus	GCA_000011505.1	PRJNA265	Complete Genome	O
Staphylococcus aureus	GCA_000160335.2	PRJNA34891	Complete Genome	X
Staphylococcus aureus	GCA_008693765.1	PRJNA231221	Complete Genome	O
Staphylococcus aureus	GCA_003595425.1	PRJNA312385	Complete Genome	O
Staphylococcus aureus	GCA_003425915.1	PRJNA393749	Complete Genome	X
Staphylococcus aureus	GCA_002204575.1	PRJNA315880	Complete Genome	O
Staphylococcus aureus	GCA_003354745.1	PRJNA393749	Complete Genome	X
Staphylococcus aureus	GCA_009176785.1	PRJDB8056	Complete Genome	O
Staphylococcus aureus	GCA_007726565.1	PRJNA555718	Complete Genome	X
Staphylococcus aureus	GCA_900635315.1	PRJEB6403	Complete Genome	X
Staphylococcus aureus	GCA_008330585.1	PRJNA278886	Complete Genome	X
Staphylococcus aureus	GCA_000769575.1	PRJNA264181	Complete Genome	O
Staphylococcus aureus	GCA_003354625.1	PRJNA393749	Complete Genome	X
Staphylococcus aureus	GCA_900635275.1	PRJEB6403	Complete Genome	X
Staphylococcus aureus	GCA_001956815.1	PRJNA260675	Complete Genome	O
Staphylococcus aureus	GCA_008935155.1	PRJNA470993	Complete Genome	O
Staphylococcus aureus	GCA_003030225.1	PRJNA243331	Complete Genome	X
Staphylococcus aureus	GCA_009912815.1	PRJNA528186	Complete Genome	X
Staphylococcus aureus	GCA_003952625.1	PRJNA509314	Complete Genome	X
Staphylococcus aureus	GCA_009913115.1	PRJNA528186	Complete Genome	O
Staphylococcus aureus	GCA_001656075.1	PRJNA321000	Complete Genome	X
Staphylococcus aureus	GCA_003944865.1	PRJNA437499	Complete Genome	X
Staphylococcus aureus	GCA_900155335.1	PRJEB12552	Complete Genome	O
Staphylococcus aureus	GCA_000772025.1	PRJNA259937	Complete Genome	X
Staphylococcus aureus	GCA_007726525.1	PRJNA555718	Complete Genome	X
Staphylococcus aureus	GCA_000210315.1	PRJNA41277	Complete Genome	X
Staphylococcus aureus	GCA_005954685.1	PRJNA544229	Complete Genome	O
Staphylococcus aureus	GCA_008329885.1	PRJNA278886	Complete Genome	O
Staphylococcus aureus	GCA_001019575.2	PRJNA231221	Complete Genome	O
Staphylococcus aureus	GCA_008935035.1	PRJNA470993	Complete Genome	O
Staphylococcus aureus	GCA_008935535.1	PRJNA470993	Complete Genome	O
Staphylococcus aureus	GCA_013008375.1	PRJNA630284	Complete Genome	O
Staphylococcus aureus	GCA_009912435.1	PRJNA528186	Complete Genome	X
Staphylococcus aureus	GCA_009913175.1	PRJNA528186	Complete Genome	O
Staphylococcus aureus	GCA_008934795.1	PRJNA470993	Complete Genome	O
Staphylococcus aureus	GCA_009913035.1	PRJNA528186	Complete Genome	X
Staphylococcus aureus	GCA_001045995.2	PRJNA246401	Complete Genome	O
Staphylococcus aureus	GCA_008935995.1	PRJNA470993	Complete Genome	O
Staphylococcus aureus	GCA_002000685.1	PRJNA312385	Complete Genome	O
Staphylococcus aureus	GCA_001515705.1	PRJNA288682	Complete Genome	O
Staphylococcus aureus	GCA_001018805.2	PRJNA231221	Complete Genome	X
Staphylococcus aureus	GCA_002803885.1	PRJNA418239	Complete Genome	O
Staphylococcus aureus	GCA_900635255.1	PRJEB6403	Complete Genome	O
Staphylococcus aureus	GCA_003203655.1	PRJNA316321	Complete Genome	X
Staphylococcus aureus	GCA_000470845.1	PRJNA167119	Complete Genome	O
Staphylococcus aureus	GCA_900620245.1	PRJEB29881	Complete Genome	O
Staphylococcus aureus	GCA_004193895.1	PRJNA384209	Complete Genome	X
Staphylococcus aureus	GCA_004136255.1	PRJNA377392	Complete Genome	O
Staphylococcus aureus	GCA_000011525.1	PRJNA266	Complete Genome	X
Staphylococcus aureus	GCA_003073415.1	PRJNA451172	Complete Genome	O
Staphylococcus aureus	GCA_001611385.1	PRJNA298761	Complete Genome	X
Staphylococcus aureus	GCA_008934875.1	PRJNA470993	Complete Genome	O
Staphylococcus aureus	GCA_002000645.1	PRJNA312385	Complete Genome	O
Staphylococcus aureus	GCA_008937055.1	PRJNA470993	Complete Genome	O
Staphylococcus aureus	GCA_008936775.1	PRJNA470993	Complete Genome	O
Staphylococcus aureus	GCA_900324045.1	PRJEB25360	Complete Genome	X
Staphylococcus aureus	GCA_900637155.1	PRJEB6403	Complete Genome	X
Staphylococcus aureus	GCA_900324355.1	PRJEB25220	Complete Genome	O
Staphylococcus aureus	GCA_002850415.1	PRJNA376656	Complete Genome	X
Staphylococcus aureus	GCA_002097595.2	PRJNA319679	Complete Genome	O
Staphylococcus aureus	GCA_008935455.1	PRJNA470993	Complete Genome	O
Staphylococcus aureus	GCA_000189435.3	PRJNA62079	Complete Genome	X
Staphylococcus aureus	GCA_009913215.1	PRJNA528186	Complete Genome	X
Staphylococcus aureus	GCA_900635285.1	PRJEB6403	Complete Genome	X
Staphylococcus aureus	GCA_008620055.1	PRJDB8599	Complete Genome	O
Staphylococcus aureus	GCA_008935475.1	PRJNA470993	Complete Genome	O
Staphylococcus aureus	GCA_009739825.1	PRJNA503808	Complete Genome	O
Staphylococcus aureus	GCA_008934515.1	PRJNA470993	Complete Genome	O
Staphylococcus aureus	GCA_009912555.1	PRJNA528186	Complete Genome	X
Staphylococcus aureus	GCA_010669265.1	PRJNA576781	Complete Genome	O
Staphylococcus aureus	GCA_003354565.1	PRJNA393749	Complete Genome	O
Staphylococcus aureus	GCA_003193725.1	PRJNA316321	Complete Genome	O
Staphylococcus aureus	GCA_002089035.2	PRJNA362943	Complete Genome	X
Staphylococcus aureus	GCA_001307235.1	PRJNA287201	Complete Genome	O
Staphylococcus aureus	GCA_009912875.1	PRJNA528186	Complete Genome	X
Staphylococcus aureus	GCA_009912375.1	PRJNA528186	Complete Genome	X
Staphylococcus aureus	GCA_000412775.1	PRJNA197422	Complete Genome	O
Staphylococcus aureus	GCA_009912755.1	PRJNA528186	Complete Genome	X
Staphylococcus aureus	GCA_900324405.1	PRJEB25220	Complete Genome	O
Staphylococcus aureus	GCA_001611345.1	PRJNA298754	Complete Genome	X
Staphylococcus aureus	GCA_001018845.2	PRJNA231221	Complete Genome	X
Staphylococcus aureus	GCA_004421085.1	PRJNA528317	Complete Genome	X
Staphylococcus aureus	GCA_008244725.1	PRJNA527676	Complete Genome	O
Staphylococcus aureus	GCA_007813675.1	PRJNA482667	Complete Genome	X
Staphylococcus aureus	GCA_009739755.1	PRJNA503808	Complete Genome	O
Staphylococcus aureus	GCA_009912595.1	PRJNA528186	Complete Genome	X
Staphylococcus aureus	GCA_008936735.1	PRJNA470993	Complete Genome	O
Staphylococcus aureus	GCA_000969225.1	PRJNA279236	Complete Genome	O
Staphylococcus aureus	GCA_008934295.1	PRJNA470993	Complete Genome	O
Staphylococcus aureus	GCA_003827735.1	PRJNA480363	Complete Genome	O
Staphylococcus aureus	GCA_008934935.1	PRJNA470993	Complete Genome	O
Staphylococcus aureus	GCA_003595385.1	PRJNA312385	Complete Genome	O
Staphylococcus aureus	GCA_009911965.1	PRJNA528186	Complete Genome	X
Staphylococcus aureus	GCA_002000865.1	PRJNA312385	Complete Genome	O
Staphylococcus aureus	GCA_003073635.1	PRJNA316321	Complete Genome	O
Staphylococcus aureus	GCA_003354605.1	PRJNA393749	Complete Genome	X
Staphylococcus aureus	GCA_001717645.3	PRJNA321122	Complete Genome	O
Staphylococcus aureus	GCA_009912055.1	PRJNA528186	Complete Genome	X
Staphylococcus aureus	GCA_000815165.1	PRJNA268517	Complete Genome	O
Staphylococcus aureus	GCA_003354645.1	PRJNA393749	Complete Genome	X
Staphylococcus aureus	GCA_008934475.1	PRJNA470993	Complete Genome	O
Staphylococcus aureus	GCA_002310395.1	PRJNA406184	Complete Genome	X
Staphylococcus aureus	GCA_003955945.1	PRJNA490564	Complete Genome	X
Staphylococcus aureus	GCA_002355355.1	PRJDB4364	Complete Genome	O
Staphylococcus aureus	GCA_900324345.1	PRJEB25220	Complete Genome	O
Staphylococcus aureus	GCA_009912255.1	PRJNA528186	Complete Genome	X
Staphylococcus aureus	GCA_003354765.1	PRJNA393749	Complete Genome	O
Staphylococcus aureus	GCA_002000805.1	PRJNA312385	Complete Genome	O
Staphylococcus aureus	GCA_009739845.1	PRJNA503808	Complete Genome	O
Staphylococcus aureus	GCA_009740205.1	PRJNA503808	Complete Genome	O
Staphylococcus aureus	GCA_008934035.1	PRJNA470993	Complete Genome	O
Staphylococcus aureus	GCA_008934815.1	PRJNA470993	Complete Genome	O
Staphylococcus aureus	GCA_003855575.1	PRJNA506374	Complete Genome	X
Staphylococcus aureus	GCA_003573835.1	PRJDB7266	Complete Genome	O
Staphylococcus aureus	GCA_001018685.2	PRJNA231221	Complete Genome	X
Staphylococcus aureus	GCA_002000725.1	PRJNA312385	Complete Genome	O
Staphylococcus aureus	GCA_005885975.1	PRJNA534078	Complete Genome	O
Staphylococcus aureus	GCA_009912415.1	PRJNA528186	Complete Genome	X
Staphylococcus aureus	GCA_001640905.1	PRJNA300829	Complete Genome	O
Staphylococcus aureus	GCA_003490125.1	PRJNA483014	Complete Genome	X
Staphylococcus aureus	GCA_012044475.1	PRJNA615760	Complete Genome	X

## Sheet: Table S2
Table S2. Information of conserved domain analysis for identified putative endolysins.
				Conserved domain 1					Conserved domain 2					Conserved domain 3
Name	GenBank	Domain	Amino acids	Conserved domain (Accession)	E-value	Bit-score	From (Amino acids)	To (Amino acids)	Conserved domain (Accession)	E-value	Bit-score	From (Amino acids)	To (Amino acids)	Conserved domain (Accession)	E-value	Bit-score	From (Amino acids)	To (Amino acids)
Putative_endolysin_1	GCA_000568455.1	Single domain	251	CHAP (pfam05257)	8.13406e-05	40.0928	20	109	.	.	.	.	.	.	.	.	.	.
Putative_endolysin_2	GCA_000284535.1	Single domain	251	CHAP (pfam05257)	8.88836e-05	40.0928	20	109	.	.	.	.	.	.	.	.	.	.
Putative_endolysin_3	GCA_000025145.2	Single domain	251	CHAP (pfam05257)	7.66705e-05	40.0928	20	109	.	.	.	.	.	.	.	.	.	.
Putative_endolysin_4	GCA_000010445.1	Single domain	243	CHAP (pfam05257)	8.84799e-05	40.0928	20	109	.	.	.	.	.	.	.	.	.	.
Putative_endolysin_5	GCA_001307235.1	Single domain	251	CHAP (pfam05257)	8.29596e-05	40.0928	20	109	.	.	.	.	.	.	.	.	.	.
Putative_endolysin_6	GCA_900474575.1	Single domain	213	CHAP (pfam05257)	1.36285e-08	50.108	31	113	.	.	.	.	.	.	.	.	.	.
Putative_endolysin_7	GCA_003573835.1	Single domain	251	CHAP (pfam05257)	7.66705e-05	40.0928	20	109	.	.	.	.	.	.	.	.	.	.
Putative_endolysin_8	GCA_009740205.1	Single domain	251	CHAP (pfam05257)	7.15595e-05	40.478	20	109	.	.	.	.	.	.	.	.	.	.
Putative_endolysin_9	GCA_900324345.1	Single domain	251	CHAP (pfam05257)	8.62947e-05	40.0928	20	109	.	.	.	.	.	.	.	.	.	.
Putative_endolysin_10	GCA_002140115.1	Single domain	101	CHAP (pfam05257)	0.000874343	35.0852	20	94	.	.	.	.	.	.	.	.	.	.
Putative_endolysin_11	GCA_900324405.1	Single domain	251	CHAP (pfam05257)	5.2199e-05	40.8632	20	109	.	.	.	.	.	.	.	.	.	.
Putative_endolysin_12	GCA_008935455.1	Single domain	251	CHAP (pfam05257)	6.94745e-05	40.478	20	109	.	.	.	.	.	.	.	.	.	.
Putative_endolysin_13	GCA_004136255.1	Single domain	237	CHAP (pfam05257)	3.59538e-08	49.3376	31	119	.	.	.	.	.	.	.	.	.	.
Putative_endolysin_14	GCA_004136255.1	Single domain	132	CHAP (pfam05257)	1.00996e-07	46.256	31	106	.	.	.	.	.	.	.	.	.	.
Putative_endolysin_15	GCA_001019575.2	Single domain	251	CHAP (pfam05257)	6.87931e-05	40.478	20	109	.	.	.	.	.	.	.	.	.	.
Putative_endolysin_16	GCA_008934415.1	Single domain	449	CHAP (pfam05257)	0.00389158	36.2408	40	107	.	.	.	.	.	.	.	.	.	.
Putative_endolysin_17	GCA_005890015.1	Single domain	251	CHAP (pfam05257)	5.70428e-05	40.478	20	109	.	.	.	.	.	.	.	.	.	.
Putative_endolysin_18	GCA_003030065.1	Single domain	251	CHAP (pfam05257)	9.24565e-05	40.0928	20	109	.	.	.	.	.	.	.	.	.	.
Putative_endolysin_19	GCA_006088835.1	Single domain	251	CHAP (pfam05257)	6.35766e-05	40.478	20	109	.	.	.	.	.	.	.	.	.	.
Putative_endolysin_20	GCA_008935095.1	Single domain	251	CHAP (pfam05257)	6.74502e-05	40.478	20	109	.	.	.	.	.	.	.	.	.	.
Putative_endolysin_21	GCA_007185035.1	Single domain	251	CHAP (pfam05257)	6.2953e-05	40.478	20	109	.	.	.	.	.	.	.	.	.	.
Putative_endolysin_22	GCA_009857055.1	Single domain	251	CHAP (pfam05257)	0.000162085	39.3224	28	109	.	.	.	.	.	.	.	.	.	.
Putative_endolysin_23	GCA_000568455.1	Single domain	98	SH3b (smart00287)	1.28732e-08	46.9424	16	84	.	.	.	.	.	.	.	.	.	.
Putative_endolysin_24	GCA_000485885.1	Single domain	98	SH3b (smart00287)	2.66013e-08	46.172	16	84	.	.	.	.	.	.	.	.	.	.
Putative_endolysin_25	GCA_000239235.1	Single domain	98	SH3b (smart00287)	2.60314e-08	46.172	16	84	.	.	.	.	.	.	.	.	.	.
Putative_endolysin_26	GCA_000025145.2	Single domain	68	SH3b (smart00287)	1.91748e-07	42.7052	1	54	.	.	.	.	.	.	.	.	.	.
Putative_endolysin_27	GCA_003827735.1	Single domain	98	SH3b (smart00287)	9.92498e-09	47.3276	16	84	.	.	.	.	.	.	.	.	.	.
Putative_endolysin_28	GCA_002803885.1	Single domain	98	SH3b (smart00287)	1.30135e-08	46.9424	16	84	.	.	.	.	.	.	.	.	.	.
Putative_endolysin_29	GCA_900324215.1	Single domain	68	SH3b (smart00287)	4.95371e-07	41.9348	1	54	.	.	.	.	.	.	.	.	.	.
Putative_endolysin_30	GCA_005705635.1	Single domain	124	SH3b (smart00287)	3.61459e-08	46.5572	42	110	.	.	.	.	.	.	.	.	.	.
Putative_endolysin_31	GCA_008935095.1	Single domain	68	SH3b (smart00287)	1.75719e-07	43.0904	1	54	.	.	.	.	.	.	.	.	.	.
Putative_endolysin_32	GCA_001548415.1	Single domain	98	SH3b (smart00287)	1.90143e-08	46.5572	16	84	.	.	.	.	.	.	.	.	.	.
Putative_endolysin_33	GCA_008935755.1	Single domain	88	SH3b (smart00287)	5.04115e-08	45.0164	12	73	.	.	.	.	.	.	.	.	.	.
Putative_endolysin_34	GCA_900324285.1	Single domain	99	SH3b (smart00287)	7.3419e-08	45.0164	23	85	.	.	.	.	.	.	.	.	.	.
Putative_endolysin_35	GCA_013046865.1	Single domain	98	SH3b (smart00287)	2.41806e-07	43.8608	22	84	.	.	.	.	.	.	.	.	.	.
Putative_endolysin_36	GCA_008936215.1	Single domain	98	SH3b (smart00287)	7.43925e-08	45.0164	16	82	.	.	.	.	.	.	.	.	.	.
Putative_endolysin_37	GCA_900324335.1	Single domain	99	SH3b (smart00287)	3.4054e-08	45.7868	17	85	.	.	.	.	.	.	.	.	.	.
Putative_endolysin_38	GCA_900324265.1	Single domain	98	SH3b (smart00287)	3.20255e-07	43.4756	22	83	.	.	.	.	.	.	.	.	.	.
Putative_endolysin_39	GCA_000568455.1	Single domain	632	LytD (COG4193)	4.26908e-69	224.754	419	632	.	.	.	.	.	.	.	.	.	.
Putative_endolysin_40	GCA_000828035.1	Single domain	632	LytD (COG4193)	2.71221e-69	225.139	419	632	.	.	.	.	.	.	.	.	.	.
Putative_endolysin_41	GCA_000239235.1	Single domain	632	LytD (COG4193)	1.11466e-68	223.599	419	632	.	.	.	.	.	.	.	.	.	.
Putative_endolysin_42	GCA_000010445.1	Single domain	632	LytD (COG4193)	8.65427e-69	223.984	419	632	.	.	.	.	.	.	.	.	.	.
Putative_endolysin_43	GCA_001717645.3	Single domain	632	LytD (COG4193)	8.47365e-69	223.984	419	632	.	.	.	.	.	.	.	.	.	.
Putative_endolysin_44	GCA_001956815.1	Single domain	632	LytD (COG4193)	6.61849e-68	221.673	419	632	.	.	.	.	.	.	.	.	.	.
Putative_endolysin_45	GCA_004153345.1	Single domain	632	LytD (COG4193)	6.79029e-69	223.984	419	632	.	.	.	.	.	.	.	.	.	.
Putative_endolysin_46	GCA_001975005.1	Single domain	632	LytD (COG4193)	1.34762e-68	223.213	419	632	.	.	.	.	.	.	.	.	.	.
Putative_endolysin_47	GCA_001183705.3	Single domain	632	LytD (COG4193)	1.52937e-68	223.213	419	632	.	.	.	.	.	.	.	.	.	.
Putative_endolysin_48	GCA_008934815.1	Single domain	632	LytD (COG4193)	9.21954e-69	223.599	419	632	.	.	.	.	.	.	.	.	.	.
Putative_endolysin_49	GCA_008934035.1	Single domain	632	LytD (COG4193)	1.16268e-68	223.599	419	632	.	.	.	.	.	.	.	.	.	.
Putative_endolysin_50	GCA_000969225.1	Single domain	632	LytD (COG4193)	7.08287e-69	223.984	419	632	.	.	.	.	.	.	.	.	.	.
Putative_endolysin_51	GCA_003193725.1	Single domain	632	LytD (COG4193)	1.26871e-69	225.91	419	632	.	.	.	.	.	.	.	.	.	.
Putative_endolysin_52	GCA_004136255.1	Single domain	398	LytD (COG4193)	1.73069e-70	221.673	185	398	.	.	.	.	.	.	.	.	.	.
Putative_endolysin_53	GCA_004136255.1	Single domain	416	LytD (COG4193)	1.83843e-70	222.058	203	416	.	.	.	.	.	.	.	.	.	.
Putative_endolysin_54	GCA_008935035.1	Single domain	632	LytD (COG4193)	1.66396e-68	223.213	419	632	.	.	.	.	.	.	.	.	.	.
Putative_endolysin_55	GCA_008935155.1	Single domain	632	LytD (COG4193)	7.54555e-69	223.984	419	632	.	.	.	.	.	.	.	.	.	.
Putative_endolysin_56	GCA_002355355.1	Single domain	632	LytD (COG4193)	1.04112e-67	220.902	419	632	.	.	.	.	.	.	.	.	.	.
Putative_endolysin_57	GCA_001725965.1	Single domain	564	LytD (COG4193)	5.60071e-69	222.828	351	564	.	.	.	.	.	.	.	.	.	.
Putative_endolysin_58	GCA_008934235.1	Single domain	632	LytD (COG4193)	1.175e-68	223.599	419	632	.	.	.	.	.	.	.	.	.	.
Putative_endolysin_59	GCA_003073635.1	Single domain	632	LytD (COG4193)	3.8669e-68	222.058	419	632	.	.	.	.	.	.	.	.	.	.
Putative_endolysin_60	GCA_900017775.1	Single domain	632	LytD (COG4193)	7.38806e-69	223.984	419	632	.	.	.	.	.	.	.	.	.	.
Putative_endolysin_61	GCA_008935015.1	Single domain	632	LytD (COG4193)	7.15797e-69	223.984	419	632	.	.	.	.	.	.	.	.	.	.
Putative_endolysin_62	GCA_900607295.1	Single domain	632	LytD (COG4193)	5.98306e-69	224.369	419	632	.	.	.	.	.	.	.	.	.	.
Putative_endolysin_63	GCA_001640905.1	Single domain	632	LytD (COG4193)	1.02448e-68	223.599	419	632	.	.	.	.	.	.	.	.	.	.
Putative_endolysin_64	GCA_008934415.1	Single domain	254	LytD (COG4193)	7.32783e-70	214.739	41	254	.	.	.	.	.	.	.	.	.	.
Putative_endolysin_65	GCA_900474725.1	Single domain	632	LytD (COG4193)	6.23644e-67	218.976	419	632	.	.	.	.	.	.	.	.	.	.
Putative_endolysin_66	GCA_900474725.1	Single domain	632	LytD (COG4193)	9.02713e-69	223.599	406	632	.	.	.	.	.	.	.	.	.	.
Putative_endolysin_67	GCA_005706035.1	Single domain	564	LytD (COG4193)	6.56828e-69	222.443	351	564	.	.	.	.	.	.	.	.	.	.
Putative_endolysin_68	GCA_008935275.1	Single domain	632	LytD (COG4193)	8.74602e-69	223.984	419	632	.	.	.	.	.	.	.	.	.	.
Putative_endolysin_69	GCA_008937855.1	Single domain	632	LytD (COG4193)	1.3195e-68	223.213	419	632	.	.	.	.	.	.	.	.	.	.
Putative_endolysin_70	GCA_009913095.1	Single domain	632	LytD (COG4193)	8.65427e-69	223.984	419	632	.	.	.	.	.	.	.	.	.	.
Putative_endolysin_71	GCA_006088835.1	Single domain	632	LytD (COG4193)	1.69941e-68	223.213	419	632	.	.	.	.	.	.	.	.	.	.
Putative_endolysin_72	GCA_008935095.1	Single domain	564	LytD (COG4193)	2.31857e-69	223.599	351	564	.	.	.	.	.	.	.	.	.	.
Putative_endolysin_73	GCA_003203635.1	Single domain	632	LytD (COG4193)	7.87066e-69	223.984	419	632	.	.	.	.	.	.	.	.	.	.
Putative_endolysin_74	GCA_009913155.1	Single domain	632	LytD (COG4193)	2.88946e-69	225.139	419	632	.	.	.	.	.	.	.	.	.	.
Putative_endolysin_75	GCA_008934435.1	Single domain	632	LytD (COG4193)	1.39092e-68	223.213	419	632	.	.	.	.	.	.	.	.	.	.
Putative_endolysin_76	GCA_008934435.1	Single domain	632	LytD (COG4193)	1.37634e-68	223.213	419	632	.	.	.	.	.	.	.	.	.	.
Putative_endolysin_77	GCA_008934055.1	Single domain	632	LytD (COG4193)	2.5367e-68	222.443	419	632	.	.	.	.	.	.	.	.	.	.
Putative_endolysin_78	GCA_008934375.1	Single domain	632	LytD (COG4193)	9.82171e-69	223.599	419	632	.	.	.	.	.	.	.	.	.	.
Putative_endolysin_79	GCA_009176785.1	Single domain	564	LytD (COG4193)	8.0373e-69	222.058	351	564	.	.	.	.	.	.	.	.	.	.
Putative_endolysin_80	GCA_003194405.1	Single domain	632	LytD (COG4193)	5.49893e-69	224.369	419	632	.	.	.	.	.	.	.	.	.	.
Putative_endolysin_81	GCA_008936435.1	Single domain	632	LytD (COG4193)	5.85817e-69	224.369	419	632	.	.	.	.	.	.	.	.	.	.
Putative_endolysin_82	GCA_008934395.1	Single domain	632	LytD (COG4193)	6.86228e-69	223.984	419	632	.	.	.	.	.	.	.	.	.	.
Putative_endolysin_83	GCA_900620255.1	Single domain	632	LytD (COG4193)	9.02713e-69	223.599	419	632	.	.	.	.	.	.	.	.	.	.
Putative_endolysin_84	GCA_008934975.1	Single domain	254	LytD (COG4193)	1.5187e-69	213.969	41	254	.	.	.	.	.	.	.	.	.	.
Putative_endolysin_85	GCA_008935355.1	Single domain	632	LytD (COG4193)	5.79671e-69	224.369	419	632	.	.	.	.	.	.	.	.	.	.
Putative_endolysin_86	GCA_003193745.1	Single domain	632	LytD (COG4193)	1.71742e-68	223.213	419	632	.	.	.	.	.	.	.	.	.	.
Putative_endolysin_87	GCA_008935435.1	Single domain	632	LytD (COG4193)	1.05741e-68	223.599	419	632	.	.	.	.	.	.	.	.	.	.
Putative_endolysin_88	GCA_008936055.1	Single domain	632	LytD (COG4193)	1.40567e-68	223.213	419	632	.	.	.	.	.	.	.	.	.	.
Putative_endolysin_89	GCA_007185035.1	Single domain	632	LytD (COG4193)	2.23529e-68	222.828	419	632	.	.	.	.	.	.	.	.	.	.
Putative_endolysin_90	GCA_008935795.1	Single domain	632	LytD (COG4193)	7.31055e-69	223.984	419	632	.	.	.	.	.	.	.	.	.	.
Putative_endolysin_91	GCA_008936795.1	Single domain	632	LytD (COG4193)	5.73589e-69	224.369	419	632	.	.	.	.	.	.	.	.	.	.
Putative_endolysin_92	GCA_008937635.1	Single domain	632	LytD (COG4193)	2.85913e-69	225.139	419	632	.	.	.	.	.	.	.	.	.	.
Putative_endolysin_93	GCA_008934215.1	Single domain	632	LytD (COG4193)	6.37391e-69	223.984	419	632	.	.	.	.	.	.	.	.	.	.
Putative_endolysin_94	GCA_008936855.1	Single domain	632	LytD (COG4193)	5.95661e-68	221.673	419	632	.	.	.	.	.	.	.	.	.	.
Putative_endolysin_95	GCA_008936575.1	Single domain	632	LytD (COG4193)	2.84854e-68	222.443	419	632	.	.	.	.	.	.	.	.	.	.
Putative_endolysin_96	GCA_003945425.1	Single domain	632	LytD (COG4193)	8.2968e-69	223.984	419	632	.	.	.	.	.	.	.	.	.	.
Putative_endolysin_97	GCA_004785995.1	Single domain	632	LytD (COG4193)	5.55723e-69	224.369	419	632	.	.	.	.	.	.	.	.	.	.
Putative_endolysin_98	GCA_004614315.1	Single domain	632	LytD (COG4193)	5.67571e-69	224.369	419	632	.	.	.	.	.	.	.	.	.	.
Putative_endolysin_99	GCA_000025145.2	Single domain	470	MurNAc-LAA superfamily (cl02713)	1.71635e-23	96.9253	171	357	.	.	.	.	.	.	.	.	.	.
Putative_endolysin_100	GCA_008934815.1	Single domain	470	MurNAc-LAA superfamily (cl02713)	1.85813e-23	96.5401	171	357	.	.	.	.	.	.	.	.	.	.
Putative_endolysin_101	GCA_008934035.1	Single domain	470	MurNAc-LAA superfamily (cl02713)	1.64955e-23	96.9253	171	357	.	.	.	.	.	.	.	.	.	.
Putative_endolysin_102	GCA_002140115.1	Single domain	470	MurNAc-LAA superfamily (cl02713)	1.2493e-23	97.3105	171	357	.	.	.	.	.	.	.	.	.	.
Putative_endolysin_103	GCA_008935895.1	Single domain	470	MurNAc-LAA superfamily (cl02713)	2.22138e-23	96.5401	171	357	.	.	.	.	.	.	.	.	.	.
Putative_endolysin_104	GCA_008934095.1	Single domain	470	MurNAc-LAA superfamily (cl02713)	1.63327e-23	96.9253	171	357	.	.	.	.	.	.	.	.	.	.
Putative_endolysin_105	GCA_900474575.1	Single domain	237	SH3_5 (pfam08460)	1.32357e-22	87.0007	151	216	.	.	.	.	.	.	.	.	.	.
Putative_endolysin_106	GCA_900155335.1	Single domain	122	SH3_5 (pfam08460)	5.84379e-21	79.2967	36	101	.	.	.	.	.	.	.	.	.	.
Putative_endolysin_107	GCA_001019575.2	Single domain	470	Amidase_3 (pfam01520)	1.88864e-24	99.2365	171	357	.	.	.	.	.	.	.	.	.	.
Putative_endolysin_108	GCA_008935015.1	Single domain	470	Amidase_3 (pfam01520)	4.22929e-24	98.4661	171	357	.	.	.	.	.	.	.	.	.	.
Putative_endolysin_109	GCA_005706035.1	Single domain	447	Amidase_3 (pfam01520)	2.95009e-33	123.119	181	362	.	.	.	.	.	.	.	.	.	.
Putative_endolysin_110	GCA_011035105.1	Single domain	470	Amidase_3 (pfam01520)	1.57863e-24	99.6217	171	357	.	.	.	.	.	.	.	.	.	.
Putative_endolysin_111	GCA_008935755.1	Single domain	410	Amidase_3 (pfam01520)	9.14209e-34	123.889	181	362	.	.	.	.	.	.	.	.	.	.
Putative_endolysin_112	GCA_013046865.1	Single domain	262	Amidase_3 (pfam01520)	5.31021e-33	118.111	49	230	.	.	.	.	.	.	.	.	.	.
Putative_endolysin_113	GCA_005707215.1	Single domain	470	Amidase_3 (pfam01520)	3.23306e-24	98.8513	171	357	.	.	.	.	.	.	.	.	.	.
Putative_endolysin_114	GCA_900324265.1	Single domain	394	Amidase_3 (pfam01520)	9.06305e-34	123.504	181	362	.	.	.	.	.	.	.	.	.	.
Putative_endolysin_115	GCA_004785995.1	Single domain	470	Amidase_3 (pfam01520)	1.67587e-24	99.6217	171	357	.	.	.	.	.	.	.	.	.	.
Putative_endolysin_116	GCA_000237265.1	Multi domain	481	CHAP (pfam05257)	1.35437e-08	51.6488	23	113	Ami_2 (smart00644)	7.85299e-24	96.2731	198	322	SH3 superfamily(cl17036)	6.29789e-18	77.7559	395	460
Putative_endolysin_117	GCA_000568455.1	Multi domain	481	CHAP (pfam05257)	2.20755e-08	51.2636	31	113	Ami_2 (smart00644)	5.22286e-24	96.6583	198	322	SH3_5 (pfam08460)	6.2024e-22	88.9267	395	460
Putative_endolysin_118	GCA_000485885.1	Multi domain	481	CHAP (pfam05257)	3.39346e-08	50.4932	31	113	Ami_2 (smart00644)	1.30794e-24	98.5843	198	322	SH3_5 (pfam08460)	6.7135e-22	88.9267	395	460
Putative_endolysin_119	GCA_000737615.1	Multi domain	481	CHAP (pfam05257)	2.65792e-08	50.8784	31	113	Ami_2 (smart00644)	1.1838e-24	98.5843	198	322	SH3_5 (pfam08460)	3.78046e-22	89.6971	395	460
Putative_endolysin_120	GCA_000828035.1	Multi domain	481	CHAP (pfam05257)	2.95955e-08	50.8784	31	113	Ami_2 (smart00644)	8.02251e-25	98.9695	198	322	SH3_5 (pfam08460)	4.60858e-22	89.3119	395	460
Putative_endolysin_121	GCA_000412775.1	Multi domain	481	CHAP (pfam05257)	3.10775e-08	50.8784	31	113	Ami_2 (smart00644)	7.18844e-25	99.3547	198	322	SH3_5 (pfam08460)	1.51091e-21	87.7711	395	460
Putative_endolysin_122	GCA_000239235.1	Multi domain	481	CHAP (pfam05257)	3.23163e-08	50.8784	31	113	Ami_2 (smart00644)	1.23198e-24	98.5843	198	322	SH3_5 (pfam08460)	7.05408e-22	88.9267	395	460
Putative_endolysin_123	GCA_000027045.1	Multi domain	481	CHAP (pfam05257)	2.63208e-08	50.8784	31	113	Ami_2 (smart00644)	9.04298e-25	98.9695	198	322	SH3_5 (pfam08460)	1.75243e-21	87.7711	395	460
Putative_endolysin_124	GCA_000145595.1	Multi domain	481	CHAP (pfam05257)	1.61479e-08	51.6488	31	113	Ami_2 (smart00644)	8.26631e-25	98.9695	198	322	SH3_5 (pfam08460)	1.48132e-21	87.7711	395	460
Putative_endolysin_125	GCA_000009585.1	Multi domain	481	CHAP (pfam05257)	1.26483e-08	52.034	31	113	Ami_2 (smart00644)	4.45406e-24	97.0435	198	322	SH3_5 (pfam08460)	1.59954e-20	85.0747	395	460
Putative_endolysin_126	GCA_000010445.1	Multi domain	481	CHAP (pfam05257)	2.737e-08	50.8784	31	113	Ami_2 (smart00644)	9.89251e-25	98.9695	198	322	SH3_5 (pfam08460)	1.76984e-21	87.7711	395	460
Putative_endolysin_127	GCA_000017125.1	Multi domain	481	CHAP (pfam05257)	3.891e-08	50.4932	31	113	Ami_2 (smart00644)	1.19567e-24	98.5843	198	322	SH3_5 (pfam08460)	7.05408e-22	88.9267	395	460
Putative_endolysin_128	GCA_000017125.1	Multi domain	481	CHAP (pfam05257)	4.7774e-08	50.108	31	113	Ami_2 (smart00644)	8.18423e-25	98.9695	198	322	SH3_5 (pfam08460)	5.61782e-22	88.9267	395	460
Putative_endolysin_129	GCA_001717645.3	Multi domain	481	CHAP (pfam05257)	1.78054e-08	51.2636	23	113	Ami_2 (smart00644)	8.50322e-24	96.2731	198	322	SH3_5 (pfam08460)	8.34645e-22	88.5415	395	460
Putative_endolysin_130	GCA_001515705.1	Multi domain	481	CHAP (pfam05257)	3.49442e-08	50.4932	31	113	Ami_2 (smart00644)	1.21976e-24	98.5843	198	322	SH3_5 (pfam08460)	7.1951e-22	88.9267	395	460
Putative_endolysin_131	GCA_001956815.1	Multi domain	481	CHAP (pfam05257)	2.45806e-08	50.8784	31	113	Ami_2 (smart00644)	1.33429e-24	98.5843	198	322	SH3_5 (pfam08460)	1.87798e-21	87.3859	395	460
Putative_endolysin_132	GCA_002204575.1	Multi domain	481	CHAP (pfam05257)	8.98517e-09	52.4192	31	113	Ami_2 (smart00644)	7.3249e-24	96.2731	198	322	SH3_5 (pfam08460)	1.65151e-21	87.7711	395	460
Putative_endolysin_133	GCA_004153345.1	Multi domain	481	CHAP (pfam05257)	3.23163e-08	50.8784	31	113	Ami_2 (smart00644)	1.73913e-23	95.5027	198	322	SH3_5 (pfam08460)	5.90289e-22	88.9267	395	460
Putative_endolysin_134	GCA_001975045.1	Multi domain	481	CHAP (pfam05257)	2.8461e-08	50.8784	31	113	Ami_2 (smart00644)	9.31774e-25	98.9695	198	322	SH3_5 (pfam08460)	2.05269e-21	87.3859	395	460
Putative_endolysin_135	GCA_013003945.1	Multi domain	481	CHAP (pfam05257)	3.10775e-08	50.8784	31	113	Ami_2 (smart00644)	1.30794e-24	98.5843	198	322	SH3_5 (pfam08460)	5.90289e-22	88.9267	395	460
Putative_endolysin_136	GCA_900324345.1	Multi domain	481	CHAP (pfam05257)	1.40002e-07	48.9524	22	113	Ami_2 (smart00644)	2.60162e-24	97.8139	198	322	SH3_5 (pfam08460)	9.69927e-20	82.7635	395	460
Putative_endolysin_137	GCA_008934295.1	Multi domain	481	CHAP (pfam05257)	2.71038e-08	50.8784	31	113	Ami_2 (smart00644)	1.38858e-24	98.1991	198	322	SH3_5 (pfam08460)	2.31115e-21	87.3859	395	460
Putative_endolysin_138	GCA_003193725.1	Multi domain	481	CHAP (pfam05257)	4.29046e-08	50.4932	31	113	Ami_2 (smart00644)	8.02251e-25	98.9695	198	322	SH3_5 (pfam08460)	1.36866e-21	87.7711	395	460
Putative_endolysin_139	GCA_008620055.1	Multi domain	481	CHAP (pfam05257)	3.36046e-08	50.4932	31	113	Ami_2 (smart00644)	1.12622e-24	98.5843	198	322	SH3_5 (pfam08460)	7.12424e-22	88.9267	395	460
Putative_endolysin_140	GCA_002097595.2	Multi domain	481	CHAP (pfam05257)	2.79101e-08	50.8784	31	113	Ami_2 (smart00644)	9.04298e-25	98.9695	198	322	SH3_5 (pfam08460)	5.61782e-22	88.9267	395	460
Putative_endolysin_141	GCA_900620245.1	Multi domain	481	CHAP (pfam05257)	2.55604e-08	50.8784	31	113	Ami_2 (smart00644)	8.86432e-25	98.9695	198	322	SH3_5 (pfam08460)	1.68449e-21	87.7711	395	460
Putative_endolysin_142	GCA_009913115.1	Multi domain	481	CHAP (pfam05257)	3.07753e-08	50.8784	31	113	Ami_2 (smart00644)	1.03984e-24	98.5843	198	322	SH3_5 (pfam08460)	5.56248e-22	88.9267	395	460
Putative_endolysin_143	GCA_001725965.1	Multi domain	481	CHAP (pfam05257)	3.26337e-08	50.4932	31	113	Ami_2 (smart00644)	1.03984e-24	98.5843	198	322	SH3_5 (pfam08460)	1.9345e-21	87.3859	395	460
Putative_endolysin_144	GCA_004136655.1	Multi domain	481	CHAP (pfam05257)	1.81567e-08	51.2636	31	113	Ami_2 (smart00644)	7.7859e-25	98.9695	198	322	SH3_5 (pfam08460)	1.87059e-22	90.4675	395	460
Putative_endolysin_145	GCA_001640905.1	Multi domain	481	CHAP (pfam05257)	3.46043e-08	50.4932	31	113	Ami_2 (smart00644)	1.33429e-24	98.5843	198	322	SH3_5 (pfam08460)	6.84772e-22	88.9267	395	460
Putative_endolysin_146	GCA_001618305.1	Multi domain	481	CHAP (pfam05257)	1.41377e-07	48.9524	31	113	Ami_2 (smart00644)	1.16042e-24	98.5843	198	322	SH3_5 (pfam08460)	5.50768e-22	88.9267	395	460
Putative_endolysin_147	GCA_008936475.1	Multi domain	481	CHAP (pfam05257)	2.87405e-08	50.8784	31	113	Ami_2 (smart00644)	1.41655e-24	98.1991	198	322	SH3_5 (pfam08460)	4.93935e-22	89.3119	395	460
Putative_endolysin_148	GCA_003030085.1	Multi domain	481	CHAP (pfam05257)	8.89781e-09	52.4192	23	113	Ami_2 (smart00644)	3.2686e-22	91.6507	198	322	SH3_5 (pfam08460)	9.30611e-22	88.5415	395	460
Putative_endolysin_149	GCA_900474725.1	Multi domain	481	CHAP (pfam05257)	2.95955e-08	50.8784	31	113	Ami_2 (smart00644)	1.05027e-24	98.5843	198	322	SH3_5 (pfam08460)	2.03251e-21	87.3859	395	460
Putative_endolysin_150	GCA_003354945.1	Multi domain	481	CHAP (pfam05257)	2.8461e-08	50.8784	31	113	Ami_2 (smart00644)	1.78158e-24	98.1991	198	322	SH3_5 (pfam08460)	1.84122e-21	87.7711	395	460
Putative_endolysin_151	GCA_008935275.1	Multi domain	481	CHAP (pfam05257)	2.95955e-08	50.8784	31	113	Ami_2 (smart00644)	1.13751e-24	98.5843	198	322	SH3_5 (pfam08460)	2.50126e-21	87.3859	395	460
Putative_endolysin_152	GCA_003030065.1	Multi domain	481	CHAP (pfam05257)	8.89781e-09	52.4192	23	113	Ami_2 (smart00644)	1.92073e-23	95.1175	198	322	SH3_5 (pfam08460)	8.94501e-22	88.5415	395	460
Putative_endolysin_153	GCA_003030065.1	Multi domain	481	CHAP (pfam05257)	1.31524e-08	51.6488	31	113	Ami_2 (smart00644)	9.41116e-25	98.9695	198	322	SH3_5 (pfam08460)	3.01016e-22	89.6971	395	460
Putative_endolysin_154	GCA_003203675.1	Multi domain	481	CHAP (pfam05257)	2.65792e-08	50.8784	31	113	Ami_2 (smart00644)	8.5175e-25	98.9695	198	322	SH3_5 (pfam08460)	4.47368e-22	89.3119	395	460
Putative_endolysin_155	GCA_008330045.1	Multi domain	481	CHAP (pfam05257)	3.46043e-08	50.4932	31	113	Ami_2 (smart00644)	7.18658e-23	93.5767	198	322	SH3_5 (pfam08460)	6.2641e-22	88.9267	395	460
Putative_endolysin_156	GCA_009912995.1	Multi domain	481	CHAP (pfam05257)	3.10775e-08	50.8784	31	113	Ami_2 (smart00644)	5.7711e-25	99.3547	198	322	SH3_5 (pfam08460)	3.33106e-21	87.0007	395	460
Putative_endolysin_157	GCA_003194005.1	Multi domain	481	CHAP (pfam05257)	1.04033e-08	52.034	31	113	Ami_2 (smart00644)	2.81741e-24	97.4287	198	322	SH3_5 (pfam08460)	3.89448e-22	89.3119	395	460
Putative_endolysin_158	GCA_003193765.1	Multi domain	481	CHAP (pfam05257)	2.28254e-07	48.182	31	113	Ami_2 (smart00644)	9.69709e-25	98.9695	198	322	SH3_5 (pfam08460)	2.13547e-21	87.3859	395	460
Putative_endolysin_159	GCA_008934735.1	Multi domain	481	CHAP (pfam05257)	3.13827e-08	50.8784	31	113	Ami_2 (smart00644)	3.40427e-24	97.4287	198	322	SH3_5 (pfam08460)	2.01252e-21	87.3859	395	460
Putative_endolysin_160	GCA_008934155.1	Multi domain	481	CHAP (pfam05257)	3.01796e-08	50.8784	31	113	Ami_2 (smart00644)	1.3748e-24	98.5843	198	322	SH3_5 (pfam08460)	2.62794e-21	87.0007	395	460
Putative_endolysin_161	GCA_008934375.1	Multi domain	481	CHAP (pfam05257)	1.26964e-07	48.9524	31	113	Ami_2 (smart00644)	2.96127e-24	97.4287	198	322	SH3_5 (pfam08460)	5.61782e-22	88.9267	395	460
Putative_endolysin_162	GCA_008935675.1	Multi domain	481	CHAP (pfam05257)	1.32027e-07	48.9524	31	113	Ami_2 (smart00644)	1.1838e-24	98.5843	198	322	SH3_5 (pfam08460)	5.29383e-22	88.9267	395	460
Putative_endolysin_163	GCA_009176785.1	Multi domain	481	CHAP (pfam05257)	2.95955e-08	50.8784	31	113	Ami_2 (smart00644)	1.32105e-24	98.5843	198	322	SH3_5 (pfam08460)	2.65403e-21	87.0007	395	460
Putative_endolysin_164	GCA_013046865.1	Multi domain	481	CHAP (pfam05257)	2.8461e-08	50.8784	31	113	Ami_2 (smart00644)	1.4025e-24	98.1991	198	322	SH3_5 (pfam08460)	4.60858e-22	89.3119	395	460
Putative_endolysin_165	GCA_900620255.1	Multi domain	481	CHAP (pfam05257)	2.95955e-08	50.8784	31	113	Ami_2 (smart00644)	6.44096e-25	99.3547	198	322	SH3_5 (pfam08460)	1.36866e-21	87.7711	395	460
Putative_endolysin_166	GCA_003193745.1	Multi domain	481	CHAP (pfam05257)	3.23163e-08	50.8784	31	113	Ami_2 (smart00644)	6.50078e-24	96.6583	198	322	SH3_5 (pfam08460)	6.51709e-22	88.9267	395	460
Putative_endolysin_167	GCA_900324315.1	Multi domain	481	CHAP (pfam05257)	1.13595e-08	52.034	31	113	Ami_2 (smart00644)	3.33715e-24	97.4287	198	322	SH3_5 (pfam08460)	1.64756e-20	85.0747	395	460
Putative_endolysin_168	GCA_008935435.1	Multi domain	481	CHAP (pfam05257)	2.87405e-08	50.8784	31	113	Ami_2 (smart00644)	8.18423e-25	98.9695	198	322	SH3_5 (pfam08460)	4.47368e-22	89.3119	395	460
Putative_endolysin_169	GCA_008934855.1	Multi domain	481	CHAP (pfam05257)	3.9678e-08	50.4932	31	113	Ami_2 (smart00644)	1.28212e-24	98.5843	198	322	SH3_5 (pfam08460)	5.61782e-22	88.9267	395	460
Putative_endolysin_170	GCA_008934775.1	Multi domain	481	CHAP (pfam05257)	2.93077e-08	50.8784	31	113	Ami_2 (smart00644)	2.35494e-24	97.8139	198	322	SH3_5 (pfam08460)	1.43803e-21	87.7711	395	460
Putative_endolysin_171	GCA_004026165.1	Multi domain	481	CHAP (pfam05257)	1.1471e-08	52.034	31	113	Ami_2 (smart00644)	7.55625e-25	98.9695	198	322	SH3_5 (pfam08460)	2.06554e-22	90.0823	395	460
Putative_endolysin_172	GCA_008935415.1	Multi domain	481	CHAP (pfam05257)	2.76387e-08	50.8784	31	113	Ami_2 (smart00644)	2.96127e-24	97.4287	198	322	SH3_5 (pfam08460)	4.05186e-22	89.3119	395	460
Putative_endolysin_173	GCA_900474735.1	Multi domain	481	CHAP (pfam05257)	3.46043e-08	50.4932	31	113	Ami_2 (smart00644)	1.12622e-24	98.5843	198	322	SH3_5 (pfam08460)	7.56008e-22	88.5415	395	460
Putative_endolysin_174	GCA_001986135.1	Multi domain	481	CHAP (pfam05257)	2.95955e-08	50.8784	31	113	Ami_2 (smart00644)	6.25093e-25	99.3547	198	322	SH3_5 (pfam08460)	4.93935e-22	89.3119	395	460
Putative_endolysin_175	GCA_008936575.1	Multi domain	481	CHAP (pfam05257)	3.07753e-08	50.8784	31	113	Ami_2 (smart00644)	1.83566e-24	98.1991	198	322	SH3_5 (pfam08460)	2.03251e-21	87.3859	395	460
Putative_endolysin_176	GCA_001298325.2	Multi domain	481	CHAP (pfam05257)	1.74608e-08	51.2636	31	113	Ami_2 (smart00644)	5.94657e-25	99.3547	198	322	SH3_5 (pfam08460)	1.68449e-21	87.7711	395	460
Putative_endolysin_177	GCA_003193885.1	Multi domain	249	Amidase_3 (pfam01520)	1.34109e-18	78.485	20	127	SH3b (smart00287)	5.34916e-09	51.1796	167	235	.	.	.	.	.
Putative_endolysin_178	GCA_002803885.1	Multi domain	484	Amidase_3 (pfam01520)	7.40427e-33	122.734	181	362	SH3b (smart00287)	1.5595e-08	50.7944	408	469	.	.	.	.	.
Putative_endolysin_179	GCA_001019575.2	Multi domain	446	Amidase_3 (pfam01520)	1.80115e-32	121.193	143	324	SH3b (smart00287)	2.9923e-09	52.7204	364	432	.	.	.	.	.
Putative_endolysin_180	GCA_000737615.1	Multi domain	484	Amidase_3 (pfam01520)	1.81743e-32	121.578	181	362	SH3b (smart00287)	9.46548e-09	51.5648	408	470	.	.	.	.	.
Putative_endolysin_181	GCA_002355355.1	Multi domain	484	Amidase_3 (pfam01520)	1.85487e-32	121.578	181	362	SH3b (smart00287)	1.79301e-09	53.4908	402	470	.	.	.	.	.
Putative_endolysin_182	GCA_000828035.1	Multi domain	484	Amidase_3 (pfam01520)	5.3403e-33	123.119	181	362	SH3b (smart00287)	1.45999e-09	53.876	402	470	.	.	.	.	.
Putative_endolysin_183	GCA_003354965.1	Multi domain	484	Amidase_3 (pfam01520)	1.37991e-32	121.963	181	362	SH3b (smart00287)	3.10143e-09	53.1056	402	470	.	.	.	.	.
Putative_endolysin_184	GCA_009912895.1	Multi domain	484	Amidase_3 (pfam01520)	3.44171e-33	123.504	181	362	SH3b (smart00287)	1.20053e-09	54.2612	402	470	.	.	.	.	.
Putative_endolysin_185	GCA_900474725.1	Multi domain	484	Amidase_3 (pfam01520)	6.09854e-33	122.734	181	362	SH3b (smart00287)	1.09627e-08	51.5648	408	470	.	.	.	.	.
Putative_endolysin_186	GCA_008936355.1	Multi domain	484	Amidase_3 (pfam01520)	2.1178e-32	121.578	181	362	SH3b (smart00287)	4.41132e-09	52.3352	402	470	.	.	.	.	.
Putative_endolysin_187	GCA_001019255.2	Multi domain	484	Amidase_3 (pfam01520)	1.11378e-32	122.348	181	362	SH3b (smart00287)	1.07501e-08	51.5648	408	470	.	.	.	.	.
Putative_endolysin_188	GCA_008935895.1	Multi domain	484	Amidase_3 (pfam01520)	3.58531e-33	123.504	181	362	SH3b (smart00287)	1.57886e-09	53.876	402	470	.	.	.	.	.
Putative_endolysin_189	GCA_000412775.1	Multi domain	484	Amidase_3 (pfam01520)	7.63456e-33	122.734	181	362	SH3b (smart00287)	1.59438e-09	53.876	402	470	.	.	.	.	.
Putative_endolysin_190	GCA_002895385.1	Multi domain	484	Amidase_3 (pfam01520)	6.28827e-33	122.734	181	362	SH3b (smart00287)	1.65386e-08	50.7944	408	470	.	.	.	.	.
Putative_endolysin_191	GCA_002895385.1	Multi domain	484	Amidase_3 (pfam01520)	1.64121e-32	121.578	181	362	SH3b (smart00287)	4.7706e-09	52.3352	402	470	.	.	.	.	.
Putative_endolysin_192	GCA_000296595.1	Multi domain	484	Amidase_3 (pfam01520)	1.2209e-32	121.963	181	362	SH3b (smart00287)	1.79301e-09	53.4908	402	470	.	.	.	.	.
Putative_endolysin_193	GCA_009913095.1	Multi domain	484	Amidase_3 (pfam01520)	2.57046e-32	121.193	181	362	SH3b (smart00287)	4.20065e-09	52.7204	402	470	.	.	.	.	.
Putative_endolysin_194	GCA_000239235.1	Multi domain	484	Amidase_3 (pfam01520)	1.25885e-32	121.963	181	362	SH3b (smart00287)	1.40396e-09	53.876	402	470	.	.	.	.	.
Putative_endolysin_195	GCA_003111725.1	Multi domain	484	Amidase_3 (pfam01520)	1.90224e-33	124.274	181	362	SH3b (smart00287)	1.05716e-09	54.2612	402	470	.	.	.	.	.
Putative_endolysin_196	GCA_001465755.1	Multi domain	484	Amidase_3 (pfam01520)	5.67779e-33	123.119	181	362	SH3b (smart00287)	1.12894e-08	51.1796	408	470	.	.	.	.	.
Putative_endolysin_197	GCA_001465755.1	Multi domain	484	Amidase_3 (pfam01520)	1.81743e-32	121.578	181	362	SH3b (smart00287)	1.59438e-09	53.876	402	470	.	.	.	.	.
Putative_endolysin_198	GCA_008936695.1	Multi domain	484	Amidase_3 (pfam01520)	5.62009e-33	123.119	181	362	SH3b (smart00287)	1.17403e-08	51.1796	408	470	.	.	.	.	.
Putative_endolysin_199	GCA_009176785.1	Multi domain	484	Amidase_3 (pfam01520)	4.62869e-33	123.119	181	362	SH3b (smart00287)	9.84348e-09	51.5648	408	470	.	.	.	.	.
Putative_endolysin_200	GCA_008934115.1	Multi domain	484	Amidase_3 (pfam01520)	1.65803e-32	121.578	181	362	SH3b (smart00287)	8.75248e-09	51.5648	408	470	.	.	.	.	.
Putative_endolysin_201	GCA_003432365.1	Multi domain	484	Amidase_3 (pfam01520)	6.7542e-33	122.734	181	362	SH3b (smart00287)	4.7706e-09	52.3352	402	470	.	.	.	.	.
Putative_endolysin_202	GCA_900635265.1	Multi domain	484	Amidase_3 (pfam01520)	4.92127e-33	123.119	181	362	SH3b (smart00287)	1.92012e-09	53.4908	402	470	.	.	.	.	.
Putative_endolysin_203	GCA_003073715.1	Multi domain	405	Amidase_3 (pfam01520)	1.49938e-32	120.422	102	283	SH3b (smart00287)	2.30884e-08	50.4092	329	391	.	.	.	.	.
Putative_endolysin_204	GCA_003073715.1	Multi domain	484	Amidase_3 (pfam01520)	1.02646e-32	122.348	181	362	SH3b (smart00287)	9.94032e-09	51.5648	408	470	.	.	.	.	.
Putative_endolysin_205	GCA_008934095.1	Multi domain	446	Amidase_3 (pfam01520)	4.23024e-32	120.037	143	324	SH3b (smart00287)	1.72575e-08	50.7944	370	432	.	.	.	.	.
Putative_endolysin_206	GCA_900324275.1	Multi domain	484	Amidase_3 (pfam01520)	1.02646e-32	122.348	181	362	SH3b (smart00287)	8.66722e-09	51.5648	408	470	.	.	.	.	.
Putative_endolysin_207	GCA_009912975.1	Multi domain	484	Amidase_3 (pfam01520)	3.69692e-33	123.504	181	362	SH3b (smart00287)	1.84193e-08	50.7944	408	470	.	.	.	.	.
Putative_endolysin_208	GCA_008934575.1	Multi domain	484	Amidase_3 (pfam01520)	6.28827e-33	122.734	181	362	SH3b (smart00287)	1.20902e-08	51.1796	408	470	.	.	.	.	.
Putative_endolysin_209	GCA_008935795.1	Multi domain	484	Amidase_3 (pfam01520)	1.9125e-32	121.578	181	362	SH3b (smart00287)	1.29478e-08	51.1796	402	470	.	.	.	.	.
Putative_endolysin_210	GCA_008934615.1	Multi domain	484	Amidase_3 (pfam01520)	5.79495e-33	123.119	181	362	SH3b (smart00287)	1.99086e-07	47.7128	408	469	.	.	.	.	.
Putative_endolysin_211	GCA_008937635.1	Multi domain	484	Amidase_3 (pfam01520)	2.29778e-32	121.193	181	362	SH3b (smart00287)	4.41132e-09	52.3352	402	470	.	.	.	.	.
Putative_endolysin_212	GCA_008934915.1	Multi domain	484	Amidase_3 (pfam01520)	1.20851e-32	121.963	181	362	SH3b (smart00287)	3.28898e-09	52.7204	402	470	.	.	.	.	.
Putative_endolysin_213	GCA_001465635.1	Multi domain	484	Amidase_3 (pfam01520)	7.40427e-33	122.734	181	362	SH3b (smart00287)	1.45999e-09	53.876	402	470	.	.	.	.	.
Putative_endolysin_214	GCA_008370815.1	Multi domain	484	Amidase_3 (pfam01520)	7.48026e-33	122.734	181	362	SH3b (smart00287)	1.56349e-09	53.876	402	470	.	.	.	.	.
Putative_endolysin_215	GCA_006364775.1	Multi domain	484	Amidase_3 (pfam01520)	1.36591e-32	121.963	181	362	SH3b (smart00287)	1.48499e-08	51.1796	408	470	.	.	.	.	.
Putative_endolysin_216	GCA_000009585.1	Multi domain	484	Amidase_3 (pfam01520)	1.25885e-32	121.963	181	362	SH3b (smart00287)	9.65263e-09	51.5648	408	470	.	.	.	.	.
Putative_endolysin_217	GCA_000011505.1	Multi domain	484	Amidase_3 (pfam01520)	5.50646e-33	123.119	181	362	SH3b (smart00287)	1.12894e-08	51.1796	408	470	.	.	.	.	.
Putative_endolysin_218	GCA_000011265.1	Multi domain	484	Amidase_3 (pfam01520)	1.25885e-32	121.963	181	362	SH3b (smart00287)	1.4317e-09	53.876	402	470	.	.	.	.	.
Putative_endolysin_219	GCA_000012045.1	Multi domain	484	Amidase_3 (pfam01520)	5.73607e-33	123.119	181	362	SH3b (smart00287)	1.07501e-08	51.5648	408	470	.	.	.	.	.
Putative_endolysin_220	GCA_001515705.1	Multi domain	484	Amidase_3 (pfam01520)	1.46702e-32	121.963	181	362	SH3b (smart00287)	7.55723e-09	51.95	408	470	.	.	.	.	.
Putative_endolysin_221	GCA_000568455.1	Multi domain	484	Amidase_3 (pfam01520)	7.18092e-33	122.734	181	362	SH3b (smart00287)	1.59034e-08	50.7944	408	469	.	.	.	.	.
Putative_endolysin_222	GCA_000769575.1	Multi domain	484	Amidase_3 (pfam01520)	1.87389e-32	121.578	181	362	SH3b (smart00287)	6.46168e-09	51.95	408	470	.	.	.	.	.
Putative_endolysin_223	GCA_003573835.1	Multi domain	484	Amidase_3 (pfam01520)	1.55961e-32	121.963	181	362	SH3b (smart00287)	8.09321e-09	51.95	408	470	.	.	.	.	.
Putative_endolysin_224	GCA_009740205.1	Multi domain	484	Amidase_3 (pfam01520)	1.78073e-32	121.578	181	362	SH3b (smart00287)	1.01369e-08	51.5648	408	470	.	.	.	.	.
Putative_endolysin_225	GCA_008934475.1	Multi domain	484	Amidase_3 (pfam01520)	1.39406e-32	121.963	181	362	SH3b (smart00287)	9.94032e-09	51.5648	408	470	.	.	.	.	.
Putative_endolysin_226	GCA_900324405.1	Multi domain	484	Amidase_3 (pfam01520)	6.16114e-33	122.734	181	362	SH3b (smart00287)	4.5794e-08	49.6388	408	469	.	.	.	.	.
Putative_endolysin_227	GCA_010669265.1	Multi domain	484	Amidase_3 (pfam01520)	4.92127e-33	123.119	181	362	SH3b (smart00287)	9.5586e-09	51.5648	408	470	.	.	.	.	.
Putative_endolysin_228	GCA_008620055.1	Multi domain	484	Amidase_3 (pfam01520)	2.83425e-33	123.889	181	362	SH3b (smart00287)	1.41776e-09	53.876	402	470	.	.	.	.	.
Putative_endolysin_229	GCA_008936775.1	Multi domain	484	Amidase_3 (pfam01520)	2.09293e-31	118.882	181	362	SH3b (smart00287)	9.74759e-09	51.5648	402	470	.	.	.	.	.
Putative_endolysin_230	GCA_900155335.1	Multi domain	334	CHAP (pfam05257)	1.00844e-08	51.6488	31	113	Ami_2 (smart00644)	1.31139e-19	83.1763	198	302	.	.	.	.	.
Putative_endolysin_231	GCA_008935995.1	Multi domain	624	CHAP (pfam05257)	4.63967e-09	53.5748	31	119	LytD (COG4193)	1.92099e-68	222.828	411	624	.	.	.	.	.
Putative_endolysin_232	GCA_009913115.1	Multi domain	624	CHAP (pfam05257)	6.99311e-09	52.8044	31	119	LytD (COG4193)	1.58869e-68	222.828	411	624	.	.	.	.	.
Putative_endolysin_233	GCA_004136235.1	Multi domain	624	CHAP (pfam05257)	5.06603e-09	53.1896	31	119	LytD (COG4193)	4.11412e-69	224.369	411	624	.	.	.	.	.
Putative_endolysin_234	GCA_001618305.1	Multi domain	624	CHAP (pfam05257)	4.82454e-09	53.1896	31	119	LytD (COG4193)	2.10479e-67	220.132	411	624	.	.	.	.	.
Putative_endolysin_235	GCA_003030085.1	Multi domain	624	CHAP (pfam05257)	6.55333e-08	50.108	37	119	LytD (COG4193)	1.57373e-69	225.525	399	624	.	.	.	.	.
Putative_endolysin_236	GCA_008936355.1	Multi domain	630	CHAP (pfam05257)	0.000193983	40.478	38	119	LytD (COG4193)	4.45988e-69	224.369	417	630	.	.	.	.	.
Putative_endolysin_237	GCA_005707015.1	Multi domain	632	CHAP (pfam05257)	0.00378755	36.626	40	107	LytD (COG4193)	1.34762e-68	223.213	419	632	.	.	.	.	.
Putative_endolysin_238	GCA_008935895.1	Multi domain	630	CHAP (pfam05257)	0.000220319	40.0928	38	119	LytD (COG4193)	5.5076e-69	224.369	417	630	.	.	.	.	.
Putative_endolysin_239	GCA_003354945.1	Multi domain	624	CHAP (pfam05257)	5.69609e-09	53.1896	31	119	LytD (COG4193)	2.44859e-68	222.443	411	624	.	.	.	.	.
Putative_endolysin_240	GCA_005889995.1	Multi domain	630	CHAP (pfam05257)	0.000216046	40.0928	38	119	LytD (COG4193)	1.17705e-68	223.599	417	630	.	.	.	.	.
Putative_endolysin_241	GCA_900324385.1	Multi domain	624	CHAP (pfam05257)	1.53873e-09	54.7304	31	119	LytD (COG4193)	1.04962e-67	220.902	411	624	.	.	.	.	.
Putative_endolysin_242	GCA_001021875.1	Multi domain	624	CHAP (pfam05257)	4.04665e-09	53.5748	31	119	LytD (COG4193)	1.98277e-68	222.828	411	624	.	.	.	.	.
Putative_endolysin_243	GCA_008937855.1	Multi domain	624	CHAP (pfam05257)	5.42456e-09	53.1896	31	119	LytD (COG4193)	1.69252e-68	222.828	411	624	.	.	.	.	.
Putative_endolysin_244	GCA_003030065.1	Multi domain	624	CHAP (pfam05257)	2.06256e-09	54.3452	31	119	LytD (COG4193)	1.42501e-67	220.517	411	624	.	.	.	.	.
Putative_endolysin_245	GCA_011035105.1	Multi domain	624	CHAP (pfam05257)	6.40452e-09	53.1896	31	119	LytD (COG4193)	8.61849e-70	226.295	411	624	.	.	.	.	.
Putative_endolysin_246	GCA_008330045.1	Multi domain	624	CHAP (pfam05257)	4.50568e-09	53.5748	31	119	LytD (COG4193)	7.03087e-68	221.287	411	624	.	.	.	.	.
Putative_endolysin_247	GCA_009912995.1	Multi domain	624	CHAP (pfam05257)	8.84089e-09	52.8044	31	119	LytD (COG4193)	1.90083e-68	222.828	411	624	.	.	.	.	.
Putative_endolysin_248	GCA_003193765.1	Multi domain	624	CHAP (pfam05257)	4.8719e-09	53.1896	31	119	LytD (COG4193)	2.1574e-68	222.443	411	624	.	.	.	.	.
Putative_endolysin_249	GCA_013046865.1	Multi domain	624	CHAP (pfam05257)	4.33303e-09	53.5748	31	119	LytD (COG4193)	3.05585e-68	222.058	411	624	.	.	.	.	.
Putative_endolysin_250	GCA_003029645.1	Multi domain	624	CHAP (pfam05257)	4.68521e-09	53.5748	31	119	LytD (COG4193)	2.1574e-68	222.443	411	624	.	.	.	.	.
Putative_endolysin_251	GCA_008935435.1	Multi domain	624	CHAP (pfam05257)	4.82454e-09	53.1896	31	119	LytD (COG4193)	4.37414e-68	221.673	411	624	.	.	.	.	.
Putative_endolysin_252	GCA_000237265.1	Multi domain	624	CHAP (pfam05257)	5.49616e-08	50.4932	37	119	LytD (COG4193)	1.86113e-68	222.828	411	624	.	.	.	.	.
Putative_endolysin_253	GCA_008934855.1	Multi domain	624	CHAP (pfam05257)	4.8719e-09	53.1896	31	119	LytD (COG4193)	1.72862e-68	222.828	411	624	.	.	.	.	.
Putative_endolysin_254	GCA_003194025.1	Multi domain	630	CHAP (pfam05257)	0.000252695	40.0928	38	119	LytD (COG4193)	8.05179e-69	223.984	417	630	.	.	.	.	.
Putative_endolysin_255	GCA_000418345.1	Multi domain	624	CHAP (pfam05257)	5.42456e-09	53.1896	31	119	LytD (COG4193)	6.90357e-70	226.68	411	624	.	.	.	.	.
Putative_endolysin_256	GCA_005707215.1	Multi domain	624	CHAP (pfam05257)	4.04665e-09	53.5748	31	119	LytD (COG4193)	4.4297e-69	224.369	411	624	.	.	.	.	.
Putative_endolysin_257	GCA_001986135.1	Multi domain	624	CHAP (pfam05257)	4.96802e-09	53.1896	31	119	LytD (COG4193)	5.9392e-68	221.287	411	624	.	.	.	.	.
Putative_endolysin_258	GCA_006364775.1	Multi domain	624	CHAP (pfam05257)	5.21669e-09	53.1896	31	119	LytD (COG4193)	3.73403e-68	222.058	411	624	.	.	.	.	.
Putative_endolysin_259	GCA_004785995.1	Multi domain	624	CHAP (pfam05257)	4.8719e-09	53.1896	31	119	LytD (COG4193)	1.78422e-68	222.828	411	624	.	.	.	.	.
Putative_endolysin_260	GCA_000145595.1	Multi domain	624	CHAP (pfam05257)	4.77765e-09	53.5748	31	119	LytD (COG4193)	3.29005e-68	222.058	411	624	.	.	.	.	.
Putative_endolysin_261	GCA_001515705.1	Multi domain	627	CHAP (pfam05257)	1.33937e-08	52.034	40	122	LytD (COG4193)	4.47197e-70	227.065	414	627	.	.	.	.	.
Putative_endolysin_262	GCA_000769575.1	Multi domain	624	CHAP (pfam05257)	5.53158e-09	53.1896	31	119	LytD (COG4193)	8.80253e-70	226.295	411	624	.	.	.	.	.
Putative_endolysin_263	GCA_002204575.1	Multi domain	624	CHAP (pfam05257)	7.63579e-09	52.8044	31	119	LytD (COG4193)	2.47456e-68	222.443	411	624	.	.	.	.	.
Putative_endolysin_264	GCA_001975045.1	Multi domain	624	CHAP (pfam05257)	5.42456e-09	53.1896	31	119	LytD (COG4193)	8.52352e-69	223.599	411	624	.	.	.	.	.
Putative_endolysin_265	GCA_013003945.1	Multi domain	624	CHAP (pfam05257)	4.63967e-09	53.5748	31	119	LytD (COG4193)	1.17869e-67	220.517	411	624	.	.	.	.	.
Putative_endolysin_266	GCA_900324345.1	Multi domain	624	CHAP (pfam05257)	1.05407e-08	52.4192	31	119	LytD (COG4193)	4.71938e-69	224.369	411	624	.	.	.	.	.
Putative_endolysin_267	GCA_002140115.1	Multi domain	624	CHAP (pfam05257)	4.63967e-09	53.5748	31	119	LytD (COG4193)	1.10644e-67	220.902	411	624	.	.	.	.	.
Putative_endolysin_268	GCA_000485885.1	Multi domain	624	CHAP (pfam05257)	4.8719e-09	53.1896	31	119	LytD (COG4193)	2.20341e-68	222.443	411	624	.	.	.	.	.
Putative_endolysin_269	GCA_008934295.1	Multi domain	624	CHAP (pfam05257)	5.42456e-09	53.1896	31	119	LytD (COG4193)	6.90137e-69	223.984	411	624	.	.	.	.	.
Putative_endolysin_270	GCA_900324405.1	Multi domain	624	CHAP (pfam05257)	7.86289e-09	52.8044	31	119	LytD (COG4193)	6.63831e-67	218.591	411	624	.	.	.	.	.
Putative_endolysin_271	GCA_000737615.1	Multi domain	624	CHAP (pfam05257)	5.01679e-09	53.1896	31	119	LytD (COG4193)	3.02378e-68	222.058	411	624	.	.	.	.	.
Putative_endolysin_272	GCA_008620055.1	Multi domain	624	CHAP (pfam05257)	5.58588e-09	53.1896	31	119	LytD (COG4193)	2.20341e-68	222.443	411	624	.	.	.	.	.

## Sheet: Table S3
Table S3. Predicted recombinant protein solubility of putative endolysins based on Soluprot, Protein-Sol, and SKADE.
					Soluprot		Protein-Sol		SKADE
Group	Endolysin name	Origin	Amino acids	Conserved domain	Solubility	Z-score	scaled-sol	Z-score	Solubility	Z-score	Sum of Z-score
Group 3	Putative endolysin 177	GCA_003193885.1	249	Amidase_3+SH3b	0.5694	-0.268752	0.68	5.55877	0.186377	-1.63791	3.65211
Group 1	Putative endolysin 117	GCA_000568455.1	481	CHAP+Ami_2+SH3_5	0.7345	1.11413	0.354	-0.276337	0.327288	0.903142	1.74093
Group 1	Putative endolysin 129	GCA_001717645.3	481	CHAP+Ami_2+SH3_5	0.7764	1.46508	0.343	-0.473227	0.311011	0.609619	1.60147
Group 1	Putative endolysin 121	GCA_000412775.1	481	CHAP+Ami_2+SH3_5	0.7494	1.23893	0.332	-0.670118	0.329954	0.951218	1.52003
Group 1	Putative endolysin 159	GCA_008934735.1	481	CHAP+Ami_2+SH3_5	0.7177	0.97341	0.332	-0.670118	0.342763	1.1822	1.4855
Group 1	Putative endolysin 132	GCA_002204575.1	481	CHAP+Ami_2+SH3_5	0.7496	1.24061	0.343	-0.473227	0.312172	0.630555	1.39793
Group 1	Putative endolysin 147	GCA_008936475.1	481	CHAP+Ami_2+SH3_5	0.7271	1.05214	0.332	-0.670118	0.331632	0.981478	1.3635
Group 1	Putative endolysin 143	GCA_001725965.1	481	CHAP+Ami_2+SH3_5	0.7408	1.1669	0.322	-0.849109	0.333511	1.01536	1.33315
Group 1	Putative endolysin 174	GCA_001986135.1	481	CHAP+Ami_2+SH3_5	0.7216	1.00608	0.332	-0.670118	0.331876	0.985878	1.32184
Group 1	Putative endolysin 150	GCA_003354945.1	481	CHAP+Ami_2+SH3_5	0.7319	1.09235	0.322	-0.849109	0.336147	1.0629	1.30614
Group 1	Putative endolysin 176	GCA_001298325.2	481	CHAP+Ami_2+SH3_5	0.7469	1.21799	0.332	-0.670118	0.319	0.753685	1.30156
Group 1	Putative endolysin 165	GCA_900620255.1	481	CHAP+Ami_2+SH3_5	0.7303	1.07895	0.331	-0.688017	0.327627	0.909256	1.30019
Group 3	Putative endolysin 203	GCA_003073715.1	405	Amidase_3+SH3b	0.5332	-0.571964	0.52	2.69492	0.230595	-0.840527	1.28242
Group 1	Putative endolysin 144	GCA_004136655.1	481	CHAP+Ami_2+SH3_5	0.7322	1.09486	0.347	-0.401631	0.308014	0.555574	1.2488
Group 1	Putative endolysin 158	GCA_003193765.1	481	CHAP+Ami_2+SH3_5	0.7284	1.06303	0.322	-0.849109	0.334269	1.02903	1.24296
Group 1	Putative endolysin 151	GCA_008935275.1	481	CHAP+Ami_2+SH3_5	0.7218	1.00775	0.322	-0.849109	0.336662	1.07218	1.23083
Group 1	Putative endolysin 130	GCA_001515705.1	481	CHAP+Ami_2+SH3_5	0.7017	0.839394	0.332	-0.670118	0.334753	1.03776	1.20704
Group 1	Putative endolysin 141	GCA_900620245.1	481	CHAP+Ami_2+SH3_5	0.702	0.841907	0.322	-0.849109	0.344346	1.21075	1.20355
Group 1	Putative endolysin 127	GCA_000017125.1	481	CHAP+Ami_2+SH3_5	0.716	0.959171	0.327	-0.759613	0.332452	0.996265	1.19582
Group 1	Putative endolysin 173	GCA_900474735.1	481	CHAP+Ami_2+SH3_5	0.7017	0.839394	0.332	-0.670118	0.333264	1.01091	1.18018
Group 1	Putative endolysin 124	GCA_000145595.1	481	CHAP+Ami_2+SH3_5	0.7085	0.896351	0.332	-0.670118	0.329689	0.94644	1.17267
Group 1	Putative endolysin 139	GCA_008620055.1	481	CHAP+Ami_2+SH3_5	0.6838	0.689463	0.332	-0.670118	0.340995	1.15032	1.16967
Group 1	Putative endolysin 123	GCA_000027045.1	481	CHAP+Ami_2+SH3_5	0.7037	0.856146	0.322	-0.849109	0.341661	1.16233	1.16937
Group 1	Putative endolysin 155	GCA_008330045.1	481	CHAP+Ami_2+SH3_5	0.7295	1.07225	0.336	-0.598521	0.315127	0.683843	1.15757
Group 1	Putative endolysin 126	GCA_000010445.1	481	CHAP+Ami_2+SH3_5	0.7156	0.955821	0.322	-0.849109	0.335373	1.04894	1.15565
Group 1	Putative endolysin 149	GCA_900474725.1	481	CHAP+Ami_2+SH3_5	0.7169	0.966709	0.322	-0.849109	0.334027	1.02467	1.14227
Group 1	Putative endolysin 122	GCA_000239235.1	481	CHAP+Ami_2+SH3_5	0.6949	0.782437	0.332	-0.670118	0.333454	1.01433	1.12665
Group 1	Putative endolysin 170	GCA_008934775.1	481	CHAP+Ami_2+SH3_5	0.7254	1.03791	0.32	-0.884907	0.331063	0.971217	1.12422
Group 1	Putative endolysin 152	GCA_003030065.1	481	CHAP+Ami_2+SH3_5	0.7734	1.43995	0.311	-1.046	0.316733	0.712804	1.10676
Group 1	Putative endolysin 164	GCA_013046865.1	481	CHAP+Ami_2+SH3_5	0.699	0.816779	0.332	-0.670118	0.329989	0.95185	1.09851
Group 1	Putative endolysin 134	GCA_001975045.1	481	CHAP+Ami_2+SH3_5	0.7295	1.07225	0.322	-0.849109	0.325484	0.870611	1.09375
Group 1	Putative endolysin 140	GCA_002097595.2	481	CHAP+Ami_2+SH3_5	0.6815	0.670199	0.326	-0.777512	0.342232	1.17263	1.06531
Group 1	Putative endolysin 120	GCA_000828035.1	481	CHAP+Ami_2+SH3_5	0.6981	0.80924	0.332	-0.670118	0.328186	0.919336	1.05846
Group 1	Putative endolysin 163	GCA_009176785.1	481	CHAP+Ami_2+SH3_5	0.6907	0.747258	0.322	-0.849109	0.340943	1.14938	1.04753
Group 1	Putative endolysin 136	GCA_900324345.1	481	CHAP+Ami_2+SH3_5	0.7432	1.187	0.311	-1.046	0.325682	0.874181	1.01518
Group 1	Putative endolysin 153	GCA_003030065.1	481	CHAP+Ami_2+SH3_5	0.704	0.858659	0.322	-0.849109	0.332405	0.995417	1.00497
Group 1	Putative endolysin 118	GCA_000485885.1	481	CHAP+Ami_2+SH3_5	0.6993	0.819292	0.322	-0.849109	0.333934	1.02299	0.993173
Group 1	Putative endolysin 156	GCA_009912995.1	481	CHAP+Ami_2+SH3_5	0.6875	0.720455	0.332	-0.670118	0.329267	0.93883	0.989167
Group 1	Putative endolysin 167	GCA_900324315.1	481	CHAP+Ami_2+SH3_5	0.679	0.649259	0.336	-0.598521	0.329028	0.93452	0.985257
Group 1	Putative endolysin 131	GCA_001956815.1	481	CHAP+Ami_2+SH3_5	0.6942	0.776574	0.322	-0.849109	0.334852	1.03954	0.967009
Group 1	Putative endolysin 160	GCA_008934155.1	481	CHAP+Ami_2+SH3_5	0.6966	0.796676	0.322	-0.849109	0.333641	1.01771	0.965274
Group 1	Putative endolysin 148	GCA_003030085.1	481	CHAP+Ami_2+SH3_5	0.7357	1.12418	0.336	-0.598521	0.301356	0.43551	0.961167
Group 1	Putative endolysin 166	GCA_003193745.1	481	CHAP+Ami_2+SH3_5	0.6795	0.653447	0.332	-0.670118	0.33133	0.976032	0.959361
Group 1	Putative endolysin 172	GCA_008935415.1	481	CHAP+Ami_2+SH3_5	0.7147	0.948282	0.332	-0.670118	0.314575	0.673888	0.952053
Group 1	Putative endolysin 171	GCA_004026165.1	481	CHAP+Ami_2+SH3_5	0.697	0.800027	0.322	-0.849109	0.331407	0.97742	0.928338
Group 1	Putative endolysin 157	GCA_003194005.1	481	CHAP+Ami_2+SH3_5	0.6857	0.705378	0.343	-0.473227	0.313101	0.647308	0.879458
Group 1	Putative endolysin 125	GCA_000009585.1	481	CHAP+Ami_2+SH3_5	0.6917	0.755634	0.332	-0.670118	0.320905	0.788037	0.873554
Group 2	Putative endolysin 116	GCA_000237265.1	481	CHAP+Ami_2+SH3 superfamily	0.727	1.05131	0.332	-0.670118	0.302457	0.455364	0.836553
Group 1	Putative endolysin 133	GCA_004153345.1	481	CHAP+Ami_2+SH3_5	0.7157	0.956658	0.326	-0.777512	0.312951	0.644603	0.823749
Group 1	Putative endolysin 142	GCA_009913115.1	481	CHAP+Ami_2+SH3_5	0.6886	0.729668	0.318	-0.920705	0.332855	1.00353	0.812495
Group 1	Putative endolysin 145	GCA_001640905.1	481	CHAP+Ami_2+SH3_5	0.6793	0.651771	0.322	-0.849109	0.332716	1.00103	0.803688
Group 1	Putative endolysin 168	GCA_008935435.1	481	CHAP+Ami_2+SH3_5	0.6996	0.821804	0.322	-0.849109	0.323012	0.826033	0.798729
Group 1	Putative endolysin 175	GCA_008936575.1	481	CHAP+Ami_2+SH3_5	0.7169	0.966709	0.322	-0.849109	0.314029	0.664042	0.781643
Group 1	Putative endolysin 119	GCA_000737615.1	481	CHAP+Ami_2+SH3_5	0.6895	0.737207	0.322	-0.849109	0.326524	0.889365	0.777463
Group 1	Putative endolysin 146	GCA_001618305.1	481	CHAP+Ami_2+SH3_5	0.6958	0.789976	0.311	-1.046	0.33434	1.03031	0.774288
Group 1	Putative endolysin 169	GCA_008934855.1	481	CHAP+Ami_2+SH3_5	0.6662	0.542046	0.322	-0.849109	0.331554	0.980071	0.673008
Group 3	Putative endolysin 205	GCA_008934095.1	446	Amidase_3+SH3b	0.5175	-0.703468	0.5	2.33693	0.223894	-0.961366	0.6721
Group 1	Putative endolysin 135	GCA_013003945.1	481	CHAP+Ami_2+SH3_5	0.6634	0.518593	0.322	-0.849109	0.331194	0.973579	0.643063
Group 1	Putative endolysin 128	GCA_000017125.1	481	CHAP+Ami_2+SH3_5	0.6824	0.677737	0.318	-0.920705	0.325978	0.879519	0.636551
Group 1	Putative endolysin 162	GCA_008935675.1	481	CHAP+Ami_2+SH3_5	0.695	0.783275	0.31	-1.0639	0.328064	0.917136	0.636513
Group 1	Putative endolysin 161	GCA_008934375.1	481	CHAP+Ami_2+SH3_5	0.6936	0.771548	0.31	-1.0639	0.327122	0.900149	0.607799
Group 1	Putative endolysin 138	GCA_003193725.1	481	CHAP+Ami_2+SH3_5	0.7051	0.867873	0.311	-1.046	0.319849	0.768995	0.590868
Group 1	Putative endolysin 137	GCA_008934295.1	481	CHAP+Ami_2+SH3_5	0.6692	0.567174	0.311	-1.046	0.331106	0.971993	0.493167
Group 1	Putative endolysin 154	GCA_003203675.1	481	CHAP+Ami_2+SH3_5	0.6872	0.717942	0.311	-1.046	0.322605	0.818694	0.490636
Group 3	Putative endolysin 179	GCA_001019575.2	446	Amidase_3+SH3b	0.5092	-0.772988	0.486	2.08635	0.22247	-0.987045	0.326312
Group 3	Putative endolysin 202	GCA_900635265.1	484	Amidase_3+SH3b	0.4964	-0.880201	0.413	0.779711	0.235994	-0.743166	-0.843657
Group 3	Putative endolysin 187	GCA_001019255.2	484	Amidase_3+SH3b	0.4932	-0.907005	0.418	0.869206	0.2314	-0.82601	-0.863809
Group 3	Putative endolysin 192	GCA_000296595.1	484	Amidase_3+SH3b	0.5329	-0.574477	0.401	0.564921	0.228656	-0.875493	-0.885048
Group 3	Putative endolysin 199	GCA_009176785.1	484	Amidase_3+SH3b	0.5278	-0.617195	0.415	0.815509	0.213053	-1.15686	-0.958548
Group 3	Putative endolysin 216	GCA_000009585.1	484	Amidase_3+SH3b	0.4993	-0.855911	0.414	0.79761	0.226218	-0.919457	-0.977759
Group 3	Putative endolysin 188	GCA_008935895.1	484	Amidase_3+SH3b	0.5049	-0.809005	0.42	0.905004	0.211331	-1.18792	-1.09192
Group 3	Putative endolysin 206	GCA_900324275.1	484	Amidase_3+SH3b	0.5096	-0.769638	0.402	0.58282	0.226483	-0.914678	-1.1015
Group 3	Putative endolysin 196	GCA_001465755.1	484	Amidase_3+SH3b	0.5141	-0.731946	0.398	0.511224	0.227151	-0.902632	-1.12335
Group 3	Putative endolysin 200	GCA_008934115.1	484	Amidase_3+SH3b	0.4712	-1.09128	0.429	1.0661	0.214956	-1.12255	-1.14773
Group 3	Putative endolysin 193	GCA_009913095.1	484	Amidase_3+SH3b	0.4904	-0.930457	0.426	1.0124	0.207853	-1.25063	-1.16869
Group 3	Putative endolysin 217	GCA_000011505.1	484	Amidase_3+SH3b	0.4684	-1.11473	0.405	0.636518	0.238825	-0.692115	-1.17033
Group 3	Putative endolysin 186	GCA_008936355.1	484	Amidase_3+SH3b	0.493	-0.90868	0.421	0.922903	0.21149	-1.18505	-1.17082
Group 3	Putative endolysin 229	GCA_008936775.1	484	Amidase_3+SH3b	0.4747	-1.06196	0.425	0.9945	0.214671	-1.12768	-1.19515
Group 3	Putative endolysin 194	GCA_000239235.1	484	Amidase_3+SH3b	0.4616	-1.17169	0.427	1.0303	0.218264	-1.06289	-1.20428
Group 3	Putative endolysin 191	GCA_002895385.1	484	Amidase_3+SH3b	0.4878	-0.952235	0.409	0.708114	0.223641	-0.965928	-1.21005
Group 3	Putative endolysin 209	GCA_008935795.1	484	Amidase_3+SH3b	0.4857	-0.969825	0.429	1.0661	0.204705	-1.3074	-1.21113
Group 3	Putative endolysin 211	GCA_008937635.1	484	Amidase_3+SH3b	0.4926	-0.91203	0.423	0.958702	0.207439	-1.2581	-1.21143
Group 3	Putative endolysin 215	GCA_006364775.1	484	Amidase_3+SH3b	0.487	-0.958936	0.405	0.636518	0.227489	-0.896537	-1.21896
Group 3	Putative endolysin 181	GCA_002355355.1	484	Amidase_3+SH3b	0.4878	-0.952235	0.42	0.905004	0.21219	-1.17242	-1.21966
Group 3	Putative endolysin 195	GCA_003111725.1	484	Amidase_3+SH3b	0.5005	-0.84586	0.398	0.511224	0.225023	-0.941007	-1.27564
Group 3	Putative endolysin 228	GCA_008620055.1	484	Amidase_3+SH3b	0.5078	-0.784715	0.407	0.672316	0.211921	-1.17728	-1.28967
Group 3	Putative endolysin 180	GCA_000737615.1	484	Amidase_3+SH3b	0.4615	-1.17252	0.43	1.084	0.21056	-1.20182	-1.29035
Group 3	Putative endolysin 218	GCA_000011265.1	484	Amidase_3+SH3b	0.4607	-1.17923	0.427	1.0303	0.212451	-1.16772	-1.31665
Group 3	Putative endolysin 185	GCA_900474725.1	484	Amidase_3+SH3b	0.4772	-1.04102	0.405	0.636518	0.224635	-0.948003	-1.35251
Group 3	Putative endolysin 227	GCA_010669265.1	484	Amidase_3+SH3b	0.4905	-0.92962	0.393	0.421728	0.228588	-0.876719	-1.38461
Group 3	Putative endolysin 183	GCA_003354965.1	484	Amidase_3+SH3b	0.4423	-1.33334	0.418	0.869206	0.225131	-0.939059	-1.4032
Group 3	Putative endolysin 208	GCA_008934575.1	484	Amidase_3+SH3b	0.4679	-1.11892	0.405	0.636518	0.225978	-0.923785	-1.40619
Group 3	Putative endolysin 201	GCA_003432365.1	484	Amidase_3+SH3b	0.4645	-1.1474	0.406	0.654417	0.225688	-0.929015	-1.42199
Group 3	Putative endolysin 212	GCA_008934915.1	484	Amidase_3+SH3b	0.4336	-1.40622	0.42	0.905004	0.225906	-0.925084	-1.42629
Group 3	Putative endolysin 220	GCA_001515705.1	484	Amidase_3+SH3b	0.448	-1.2856	0.412	0.761811	0.2261	-0.921585	-1.44537
Group 3	Putative endolysin 224	GCA_009740205.1	484	Amidase_3+SH3b	0.4686	-1.11305	0.418	0.869206	0.20918	-1.2267	-1.47055
Group 3	Putative endolysin 222	GCA_000769575.1	484	Amidase_3+SH3b	0.4404	-1.34926	0.417	0.851307	0.223094	-0.975792	-1.47374
Group 3	Putative endolysin 190	GCA_002895385.1	484	Amidase_3+SH3b	0.4777	-1.03683	0.396	0.475426	0.225102	-0.939582	-1.50099
Group 3	Putative endolysin 225	GCA_008934475.1	484	Amidase_3+SH3b	0.4669	-1.12729	0.416	0.833408	0.209085	-1.22842	-1.5223
Group 3	Putative endolysin 219	GCA_000012045.1	484	Amidase_3+SH3b	0.4768	-1.04437	0.395	0.457526	0.22508	-0.939979	-1.52682
Group 3	Putative endolysin 198	GCA_008936695.1	484	Amidase_3+SH3b	0.4535	-1.23953	0.405	0.636518	0.224412	-0.952025	-1.55504
Group 3	Putative endolysin 223	GCA_003573835.1	484	Amidase_3+SH3b	0.4455	-1.30654	0.4	0.547022	0.232464	-0.806823	-1.56634
Group 3	Putative endolysin 226	GCA_900324405.1	484	Amidase_3+SH3b	0.4655	-1.13902	0.396	0.475426	0.224569	-0.949194	-1.61279
Group 3	Putative endolysin 207	GCA_009912975.1	484	Amidase_3+SH3b	0.4974	-0.871825	0.38	0.18904	0.222814	-0.980842	-1.66363
Group 3	Putative endolysin 197	GCA_001465755.1	484	Amidase_3+SH3b	0.441	-1.34423	0.396	0.475426	0.230557	-0.841212	-1.71002
Group 3	Putative endolysin 184	GCA_009912895.1	484	Amidase_3+SH3b	0.4963	-0.881039	0.39	0.368031	0.207859	-1.25053	-1.76353
Group 3	Putative endolysin 204	GCA_003073715.1	484	Amidase_3+SH3b	0.4592	-1.19179	0.408	0.690215	0.206282	-1.27896	-1.78054
Group 3	Putative endolysin 214	GCA_008370815.1	484	Amidase_3+SH3b	0.4585	-1.19765	0.402	0.58282	0.211062	-1.19277	-1.8076
Group 3	Putative endolysin 189	GCA_000412775.1	484	Amidase_3+SH3b	0.4433	-1.32497	0.408	0.690215	0.208186	-1.24463	-1.87938
Group 3	Putative endolysin 221	GCA_000568455.1	484	Amidase_3+SH3b	0.4427	-1.32999	0.403	0.600719	0.20978	-1.21588	-1.94516
Group 3	Putative endolysin 178	GCA_002803885.1	484	Amidase_3+SH3b	0.4403	-1.3501	0.393	0.421728	0.214105	-1.13789	-2.06626
Group 3	Putative endolysin 210	GCA_008934615.1	484	Amidase_3+SH3b	0.4234	-1.49165	0.396	0.475426	0.211824	-1.17902	-2.19525
Group 3	Putative endolysin 182	GCA_000828035.1	484	Amidase_3+SH3b	0.4052	-1.64409	0.405	0.636518	0.210919	-1.19534	-2.20292
Group 3	Putative endolysin 213	GCA_001465635.1	484	Amidase_3+SH3b	0.4419	-1.33669	0.389	0.350132	0.208375	-1.24122	-2.22778
